# Supplementary material for: Traditional Chinese medicine improves myasthenia gravis by regulating the symbiotic homeostasis of the intestinal microbiota and host
Source: Front Microbiol. 2023 Jan 6;13:1082565. doi: 10.3389/fmicb.2022.1082565 (PMC9852828; doi:10.3389/fmicb.2022.1082565)
Supplement: Supplementary file 1 [file Table_1.xlsx]

## Sheet: Sheet1
Fig.1a-AchR-Ab(nmol/L）				Fig.1b-MuSK-Ab(U/mL)				Fig.1c-Titin-Ab(U/mL)
Case	Treat	CON		Case	Treat	CON		Case	Treat	CON
3.8	0.4	0.406		0.21	0.05	0.01		0.01	0.01	0.0073
14.036	7.21	0.2547		0.01	0.01	0.01		0.152	0.03	0.0229
0.5	0.23	1.45798		0.01	0.01	0.13		0.221	0.125	0.097
11.283	1.582	0.25559		0.01	0.01	0.01		1.58	0.581	0.45268
0.309	0.231	0.30365		0.01	0.01	0.01		0.372	0.132	0.10246
0.387	0.285	1.5452		0.01	0.01	0.01		0.101	0.157	0.12196
3.077	1.68	0.36684		0.01	0.01	0.01		0.196	0.36	0.2803
0.265	0.356	0.60447		0.01	0.01	0.05		0.152	0.134	0.10402
3.877	0.623	0.56086		0.23	0.01	0.01		2.565	0.354	0.27562
2.872	0.574	0.22889		0.01	0.01	0.01		1.21	0.342	0.26626
0.761	0.201	1.9635		0.01	0.01	0.05		0.256	0.126	0.09778
6.873	2.15	0.406		0.25	0.17	0.01		1.34	0.457	0.35596
2.58	0.4	0.25648		0.15	0.01	0.01		0.137	0.12	0.0931
0.672	0.232	2.34442		0.13	0.01	0.12		3.563	0.649	0.50572
8.353	2.578	0.25648		0.01	0.01	0.15		1.232	0.932	0.72646
0.174	0.232	0.34548		0.05	0.01	0.01		0.212	0.192	0.1627
0.353	0.332	1.42327		0.01	0.01	0.12		0.176	0.278	0.2358
7.123	1.543	0.19062		0.01	0.01	0.01		0.141	0.04	0.0335
0.279	0.158	2.87219		0.01	0.01	0.05		0.2	0.355	0.30125
21	3.171	0.49589		0.22	0.01	0.01		0.16	0.251	0.21285
11.678	0.501	2.56959		0.01	0.01	0.01		0.712	0.654	0.5554
14.886	2.831	0.45228		0.01	0.01	0.05		3.98	0.351	0.29785
3.8	0.452	1.3939		0.21	0.12	0.01		0.01	0.01	0.008
9.119	3.332	2.09043		0.21	0.15	0.05		1.158	1.01	0.858
3.81	1.51	2.17087		0.01	0.01	0.01		0.26	0.35	0.297
15.41	6.787	3.89302		0.35	0.14	0.01		0.654	0.583	0.49505
8.867	2.383	0.26182		0.01	0.01	0.12		3.583	1.55	0.44915
6.314	4.318	0.33747		0.01	0.01	0.15		4.004	0.529	0.11765
2.243	0.238	0.25915		0.19	0.05	0.01		0.147	0.139	0.38455
1.232	0.323	0.16214		0.12	0.01	0.12		1.573	0.453	0.008
