# Supplementary material for: Traditional Chinese medicine improves myasthenia gravis by regulating the symbiotic homeostasis of the intestinal microbiota and host
Source: Front Microbiol. 2023 Jan 6;13:1082565. doi: 10.3389/fmicb.2022.1082565 (PMC9852828; doi:10.3389/fmicb.2022.1082565)
Supplement: Supplementary file 2 [file Table_2.xlsx]

## Sheet: Sheet1
Fig. 2a					Fig. 2b					Fig. 2c
ID	CON	Case	Treat		ID	CON	Case	Treat		#ID	CON1	CON2	CON3	CON4	CON5	CON6	CON7	CON8	CON9	CON10	Case01	Case02	Case03	Case04	Case05	Case06	Case07	Case08	Case09	Case10	Case11	Case12	Case13	Case14	Case15	Case16	Case17	Treat01	Treat02	Treat03	Treat04	Treat05	Treat06	Treat07	Treat08	Treat09	Treat10	Treat11	Treat12
Bacteroidetes	0.556142	0.294482	0.59955		Bacteroides	0.307933	0.279573	0.332586		ASV_14400	5.65e-05	0.00169621	0.00147005	0.0016114	0.00477765	0.00231815	0.000537133	0.00296837	0.000735024	0.00110254	0.00226161	0.00268566	0.00265739	0	0.000197891	0.00285528	0.00178102	0.000989455	0.00110254	0.000706754	0.00178102	0.00163967	0.00163967	0.000339242	0.00172448	0.00124389	0.0643994	0.00390128	0.000989455	0.000452322	0.0329913	0.00186583	0.0218811	0.001046	0.000593673	0.000480593	0.00110254	0.00647386	0.00706754
Firmicutes	0.332364	0.349031	0.35655		Prevotella	0.240095	0.00156843	0.259342		ASV_87	0.000254431	0.0224182	0.00703927	0.00867894	0.000876375	0.000197891	0.000226161	0	0.0110536	0.0126085	0.0032228	0.00149832	0.00262912	0	0	0.00418398	0.00325107	0.000791564	0.000113081	0.000339242	0.00163967	0	0.000226161	0	0.022503	0.0265457	0.112006	0.000197891	0.00359031	2.83e-05	0.0105448	0.000678484	0.00330761	0.000932915	5.65e-05	0.00486247	0.00347723	0.00641732	0.00446668
Proteobacteria	0.0179867	0.29714	0.0179952		Faecalibacterium	0.103389	0.105447	0.0667767		ASV_25173	0	0.000678484	0.000226161	0	2.83e-05	0	0	0	0	0	0	0.000339242	0	0	0	0.001046	0.000706754	0.00130043	0.000226161	0.00585192	0.00342069	0	0	0	0	0	5.65e-05	8.48e-05	0	0.000367512	0.00127216	0	2.83e-05	0	0	0	0	0.00777429	0.00251604
Fusobacteria	0.0555716	0.0320466	0.00687802		Shigella	0.00076517	0.151167	0.00171482		ASV_20315	8.48e-05	0.00135697	0.0122975	0.000310972	0.00302491	0.00183756	0.000310972	5.65e-05	0.00621943	0.0126085	0.00364685	0.000113081	0.000197891	0	2.83e-05	0.00633251	0.00342069	0.000791564	0.000565403	0.000706754	0.000593673	0	0.00228988	0	0.000593673	0.000791564	0.184095	0.000424052	0.00441014	0.000226161	0.0216832	0.000310972	0.00808526	0.000310972	0	0.00310972	0.00319453	0.0032228	0.00144178
Actinobacteria	0.0373569	0.0255104	0.0177972		Megamonas	0.0533413	0.00010697	0.0748742		ASV_6709	0	0	0.0056823	0.000848104	0.0110819	0.000480593	0	5.65e-05	0	0	0	0	0	0	0	0	0	0	0	0	0	0	0	0	0.000706754	0.00115908	0.0123541	0.00110254	0.00144178	0	0.00760467	0.00206372	0.00141351	0	0	0.000678484	0.000254431	0	0
Tenericutes	2.301e-05	0.00066659	0.00014035		Roseburia	0.0180769	0.0120925	0.0493512		ASV_661	0.192491	0.0696011	0.0834252	0.000197891	0.00197891	0.000452322	0.00409917	0.000763294	5.65e-05	0.00121562	0	0.000650213	0.000169621	0.0123258	0.00644559	0.0414723	0.0444407	0.034433	0.0679897	0.121929	0.0557205	0	0	0.000226161	0.00288355	0.00421225	0.0105165	0.000480593	8.48e-05	0.090521	0.00260085	0.0016114	0.00579538	0.00166794	0.000310972	0.0067283	0.0078591	0.0170186	0.00455149
Verrucomicrobia	5.355e-05	0	0.00034703		Bifidobacterium	0.035291	0.0238407	0.0161633		ASV_23319	0	0	0	0	0	0	0	0	0.000367512	0.000678484	0	0.00260085	0.00228988	0.00432533	0.00313799	0.00279875	0.00480592	0.00203545	0.0056823	0.041444	0.00285528	0	0.000282701	0	0.00149832	0.000961185	0	2.83e-05	0	5.65e-05	0	0	0	0	0	0.00135697	0.00127216	0.000848104	0.000904645
Lentisphaerae	3.32e-06	0.00028207	0		Sutterella	0.0140937	0.0277467	0.00860952		ASV_12227	2.83e-05	0.000282701	0.000169621	0	0	0	0	0	8.48e-05	0.000424052	0	0.00155486	0.000819834	0.00695446	0.00127216	0.00110254	0.000791564	0.000989455	0.0072937	0.0733893	0.0427162	0	0	0	0.000593673	0.000565403	0	0	8.48e-05	0	0	0	0	0	0	0.00401436	0.000763294	0.00155486	0.000848104
TM7	2.506e-05	0.00010482	1.937e-05		Lachnospiraceae_Clostridium	0.0241509	0.0193185	0.00585277		ASV_2288	0	5.65e-05	8.48e-05	0.000113081	0.00243123	0.000254431	0.000141351	0.000367512	5.65e-05	0.000395782	0.0883159	0.00969666	0.00802872	0.0102055	0.027733	0.0091878	0.183247	0.000367512	0.000961185	0.0211178	0.00879202	0.224663	0.00115908	0.888107	0.0908603	0.0741243	0	0.0143612	0.0278461	2.83e-05	2.83e-05	0	0.000113081	0.00364685	2.83e-05	0.00115908	0.00155486	0.000452322	0.000169621
Spirochaetes	6.46e-06	5.363e-05	1.498e-05		Enterococcus	0.0189663	0.0249672	0.00192345		ASV_6571	0	0	0	0	0	0	0	0	0	0	0	0	0	0.000141351	0.00658695	0	0	0	0	0	0	0.000452322	0	0	0.0145309	0.00952704	0	0	0	0	0	0	0	0.000197891	5.65e-05	0	0	0	0
Others	0.00046698	0.00068361	0.0007077		Others	0.183898	0.354172	0.182806		ASV_25724	8.48e-05	2.83e-05	0.000141351	0.000310972	0.000113081	0	0.000113081	0.00121562	0.00110254	0.0040709	0.000113081	0.72708	0.671784	0.195092	0.0959206	0.000763294	0.0467023	0.00226161	0.00305318	0.00141351	0.00180929	0.0135131	0.547536	0.00712408	0.137874	0.116106	0.000650213	0	0.000621943	0.000678484	2.83e-05	8.48e-05	0.000226161	0.0144178	0.00375993	0.000197891	0.000254431	0.000169621	0.000339242
										ASV_8956	0	0	0.000141351	0.000791564	0.000848104	0.00424052	0	0.000791564	8.48e-05	0	0	0.000282701	0	0	0	0.00144178	0.00121562	0.000141351	0.0029401	0.00401436	0.00124389	0	0	0.000537133	0	0	0.00163967	0.00115908	0	0	0.00127216	0.000113081	0.000254431	0	0	0	0	0.000367512	0.000141351
										ASV_22659	0.0364402	0.000141351	2.83e-05	0	2.83e-05	0	0	0	0	0	0	0	0	0.000113081	0.000141351	0	0	0	0	2.83e-05	0.000113081	0.000452322	0.000197891	0	0.00110254	0.000480593	0	0	0	0	0	0	0	0.000310972	2.83e-05	0	0	5.65e-05	0
										ASV_4911	0.00209199	0	0.000141351	0	0	0	0	0	0	0	0	0	0	0	0	0	0	0	0	0	0	0.000169621	0	0	0.00579538	0.00404263	0	0	0.000791564	0.00805699	0	0	0	0	0	0	0	0	0.000169621
										ASV_25337	0.00243123	0.000169621	0.00418398	0.000395782	8.48e-05	0.000339242	0.000197891	5.65e-05	0.000197891	5.65e-05	5.65e-05	0.000480593	0.000197891	0.000141351	0	5.65e-05	0.000141351	0.000113081	0.000395782	0.000310972	0.000961185	0	0.000593673	8.48e-05	0.00183756	0.00155486	0.000339242	0	8.48e-05	0	0	0	8.48e-05	0	2.83e-05	0.000282701	0.00138524	0	0.00206372
										ASV_6091	0.0281005	0	0	0	0	0	0	0	0	0	0	0	0	0	0	0	0	0	0	0	0	0	0	0	0	0	0	0	0	0	0	0	0	0	0	0	0	0	0
										ASV_30515	0.00463631	0.00101772	0.00291182	0.000113081	0.000735024	0.0067283	0.000565403	0	0	0	0.00452322	5.65e-05	0	0.0067283	0.00644559	0.000932915	0.000904645	0	0.000791564	0.000735024	0.000367512	0.00206372	0.00751986	0.0165098	0.00828315	0.00409917	0.000169621	0.000197891	0.00262912	0.00802872	0.000904645	8.48e-05	0.000565403	0.00308145	0.000113081	0.000508863	0.000310972	0.00118735	0.000226161
										ASV_15351	0.18729	0.00107427	5.65e-05	8.48e-05	0	0	0	0	0	0	0	0	0	0.0029401	0.00305318	0	0	0	0.000113081	2.83e-05	0	0	0.401153	0	0.00788737	0.0103469	0	0	0	0	0	0	0	0.0232381	0	0	0	0.00121562	0.000424052
										ASV_680	0.000706754	0.00163967	0.000141351	0.00101772	0.000678484	0.0247929	0	0.000254431	0	0.000452322	0	0.0105165	0.00901818	0.048031	0.034009	0.00848104	0.0112798	0	0	0	0	0.00802872	0	0.00214853	0.000254431	0.000141351	0.000197891	0.000706754	0.0110254	0.00141351	0.00836796	0.000226161	0	0	0.000197891	0.00995109	0.00901818	0	0
										ASV_15375	0	0	2.83e-05	0	0	0	0	0	0	0	0	0	0	0	0	0	0	0	0	0	0	0.00282701	0	0	0.00599327	0.00571057	0.00121562	5.65e-05	0.00260085	0	0	0.0145309	5.65e-05	0	0	0	0	0	0
										ASV_28705	0.000226161	2.83e-05	0.000197891	0	0.000141351	0.0035055	0.00819834	2.83e-05	0	0	0.00110254	0.000735024	0.000282701	0	0	0.00308145	0.00384474	0.000169621	0.000141351	0	2.83e-05	0.0279309	0.000508863	0	0.0024595	0.00197891	0.000141351	2.83e-05	0.00195064	0.0029401	0.00130043	0	0.000197891	0.0772623	2.83e-05	0	0	0.000141351	0
										ASV_22359	0	0	0.00992282	0.00726543	0.00641732	0.000537133	0.000113081	0	0.00474939	0.00811353	0.00398609	0.000282701	0.000113081	0	0	0	0	0.000565403	0.000367512	0.00200718	0.00692619	0	0.000113081	0	0.00582365	0.00726543	0.026263	0.000593673	0.00443841	0	0	0.010884	0.0091878	0	0	0.000141351	0	0.0502078	0.034744
										ASV_664	0	0	0.00107427	0.000113081	0.00223334	0	0.0145026	0.00101772	2.83e-05	0.000141351	0	5.65e-05	0.000197891	0	0	0.000197891	8.48e-05	0.000678484	0.00607808	0.00932915	0.00107427	0.000339242	0.000141351	0.000480593	0.000282701	8.48e-05	0.00265739	0.00144178	0	0	0.00110254	0.000113081	0.00178102	0.000452322	0.000226161	0.000226161	0.000367512	0.000226161	0.000113081
										ASV_24813	0.000565403	0.000424052	0.00387301	0.000452322	0.00251604	0.00313799	0.00118735	0.00163967	0.000678484	0.000593673	0.000932915	0.000310972	0.000424052	5.65e-05	8.48e-05	0.00489074	0.000904645	0.00223334	0.00243123	0.00101772	0.000763294	0.000339242	0.000565403	0.000113081	0.00200718	0.00186583	0.0132587	0.00124389	0.000791564	5.65e-05	0.00777429	0.000508863	0.00291182	0.00209199	0.000282701	0.00166794	0.00138524	0.00308145	0.00260085
										ASV_8618	0	0	0.016425	0.00251604	0.0627597	0.0377972	0.000113081	0.000961185	0.00135697	0.00135697	0	0.000452322	0	0	0	0.0937721	0.0371752	0.00200718	0.00941396	0.0574167	0.0142482	0	0	0	0.000678484	0.00127216	0.00180929	0.0122127	0.0130325	0.007011	0.00850931	0.000763294	0.0218528	0.034433	0	0.00491901	0.00771775	0.00565403	0.00432533
										ASV_24336	0.000113081	0.0037882	0.00548441	0.00175275	0.00822661	0.0081418	0.00124389	5.65e-05	0.000593673	0.000593673	0.00124389	0.000226161	0.000113081	0.000141351	0.000367512	0.00619116	0.00152659	0.00607808	0.0197043	0.0149549	0.00720889	0.00780256	0.000508863	5.65e-05	0.00195064	0.00110254	0.00590846	0.00243123	0.00121562	0.00491901	0.025952	0.000339242	0.0037882	0.00500382	0	0.00678484	0.00732197	0.0035055	0.00299664
										ASV_8564	0	0.00876375	0.0556639	0.0179233	0.0714952	0.0207786	0.000282701	0.0018941	0.000904645	0.000932915	0.000254431	0.021344	0.0202132	0	0	0.0156617	0.00839623	0.00811353	0.0398044	0.0384474	0.0134001	0	0.000226161	0.00175275	0.0106013	0.0149832	0.0105448	0.0476352	0.0116473	0.00359031	0.137647	0.00585192	0.0411613	0.0741809	0	0.145111	0.123286	0.0366947	0.0164815
										ASV_9656	0	0.0268849	0.00562576	0.00192237	0.00638905	0.0215136	0.00251604	0.000169621	0.000932915	0.00200718	0.00138524	0.00172448	0.00130043	0.000141351	5.65e-05	0.0204959	0.00599327	0.00585192	0.0286377	0.0102903	0.00754813	0	0.000141351	0.00282701	0.00604981	0.0119865	0.0208916	0.00223334	0.00107427	0.0016114	0.0222486	0.000763294	0.00240296	0.0155769	0	0.016425	0.0247081	0.0204676	0.00794391
										ASV_20389	0	0	0	0	0.00327934	0	0	0	0	0	0	0	0	0	0	0.000650213	0	0	0.00404263	0.0029401	0.00155486	0	0	0	0	0	0.00802872	0	0	0	0	0	0.00319453	0	0	0	0	0	0
										ASV_18390	0.000226161	0.00472111	0.00520171	0.00141351	0.0051169	0.00621943	0.00172448	0.00101772	0.000113081	0.000480593	0	0.00282701	0.00257258	0.0035055	0.00506036	0.00449495	0.00121562	0.0104317	0.0277047	0.0411331	0.0118735	8.48e-05	0	0.000113081	0.00248777	0.00158313	0.0266022	0.0024595	0.0043536	0.0013287	0.00760467	0.000621943	0.00149832	0	8.48e-05	0.0102055	0.0130891	0.00610635	0.00313799
										ASV_29200	0	0	0.000480593	0.000452322	0.00121562	0.0236621	0	0.000395782	0.00183756	0.00243123	0	0	0	0	0	0	0	0.00260085	0.000735024	0.0018941	0.00477765	0	0	5.65e-05	0	0	0.00398609	0.0013287	0.00415571	0.00853759	0.0067283	0	0.00636078	0	0	0.171034	0.085291	0.00457976	0.0018941
										ASV_13260	2.83e-05	0.021033	0.0124954	0.00401436	0.0254431	0.0339807	0.000113081	0.000113081	0.0135979	0.0273938	0.000848104	0.000367512	0.00144178	0	0	0.00833969	0.00723716	0.000141351	0.000282701	0.0067283	0.00121562	0	0.000565403	2.83e-05	8.48e-05	0	0.0212026	0.000678484	0.0029401	0.00409917	0.0506601	0.00279875	0.0167925	0.00831142	0	0.0105448	0.00610635	0.005965	0.0035055
										ASV_13162	0.0661804	0.00808526	0.196591	0.000932915	0.0797218	0.191078	0.117519	0.00186583	0.105419	0.261584	0.647386	0.0126368	0.0150963	0.121618	0.0567382	0.387753	0.280553	0.0442145	0.0763577	0.0450343	0.02909	0	0.000141351	0.000113081	0	0.000141351	0.0753965	0.0360727	0.113448	0.0192802	0.121335	0.0276482	0.100472	0.0519888	0	0.108275	0.132135	0.113476	0.0442711
										ASV_11305	0	0	0.0507732	8.48e-05	0.00361858	0.000452322	8.48e-05	0.000424052	0.000989455	0.00192237	0.000339242	0.000226161	0.000763294	0.000141351	8.48e-05	0.00689792	0.00305318	0.000424052	0.000621943	0.000989455	0.000621943	0	0.000961185	2.83e-05	5.65e-05	8.48e-05	0.0740113	0.000197891	0.000113081	0.000226161	0.0301077	0.000621943	0.0152376	0.000537133	0	0.00163967	0.00262912	0.00138524	0.00186583
										ASV_4062	0	0	0	0	0	0.0596217	0.488678	0	0	0	0.000480593	0.000169621	0	0	0	0	0	0	0	0	0	0.000113081	0	8.48e-05	0.0395499	0.0309275	0	0.00381647	0.00576711	0	2.83e-05	0	0	5.65e-05	0	0	0	0	0
										ASV_2140	0	0	0	0.000310972	8.48e-05	0	0.00766121	0.000113081	0	0	0.00316626	0.00313799	0.00375993	0	0	0.000169621	0	0	0	0	0	0.0807961	0	0	0.17977	0.203432	0	0	0.000876375	0.000480593	0	0	0	0.0781387	0	0	0	0	0
										ASV_10269	0	0	0.00186583	0.000310972	0.00935742	0.00503209	0.0408504	0.000197891	0.000537133	0.000282701	0	0	0.000254431	0	0	0.00686965	0.00845277	0.00285528	0.000310972	0.00147005	0.00709581	0	8.48e-05	8.48e-05	0.00175275	0.00180929	0.00585192	0	0	0.000480593	0.00107427	0.000282701	0.00172448	0.0209482	0	0.00169621	0.0021768	0.00616289	0.00650213
										ASV_28066	0.000113081	0.0253018	0	0.126905	0.0810788	0	0.00147005	0.297572	0	0	5.65e-05	0	0	0	0	0	0	0	0	0	0	0	0.00163967	0	0	0	0	0.311537	0.00460803	0	0.0291183	0.143612	0.10084	0.000113081	0.37865	0	0	0	0
										ASV_31143	0.000876375	0.0021768	0	5.65e-05	0	0	0.000169621	0	0.000226161	0	0.000113081	0.00135697	0.000904645	0	0.000367512	0	0	0	0	0	0	0.246798	0.000282701	0.0396913	0.000113081	0.000113081	0.0385039	0.00285528	0	0	0	0	0.000282701	0	2.83e-05	0	0	0.000113081	0
										ASV_10606	0.000169621	0	0.00783083	0.0104317	0.0106296	0.085913	0.0115908	0.00288355	0.00390128	0.00573884	0.00426879	0.00155486	0.00240296	0	0	0.00661521	0.00607808	0.0762446	0.118197	0.0756509	0.0656433	0.034744	5.65e-05	5.65e-05	0.0355921	0.0312385	0.0112515	0.00206372	0.0037882	8.48e-05	0.00147005	0.00429706	0.00579538	8.48e-05	0.0024595	0.00644559	0.00579538	0.0463348	0.0265739
										ASV_31233	0	0	0.00158313	0.000763294	0.000593673	0	0	0	0.00282701	0.00277048	0.00152659	0.000169621	0.000650213	0	0	0	0	0	0	0	2.83e-05	0	0	0.000508863	0.0349419	0.0411613	0.00226161	5.65e-05	5.65e-05	0	0.00766121	0.000989455	0.00152659	0	0	0	0	0.0130608	0.0100924
										ASV_27534	0.00316626	0	0.00257258	0.00466457	0.00113081	0.00163967	2.83e-05	0.000169621	0.00678484	0.0067283	0.0151811	0.00135697	0.00180929	0	0	0.00268566	0.00248777	0.00508863	0.001046	0.00316626	0.0109405	0	0.000395782	0.00121562	0.0213157	0.0254997	0.0109971	0.000254431	0.00302491	0.000113081	0.00291182	0.00302491	0.00175275	0	0	0.00166794	0.00206372	0.00604981	0.00545614
										ASV_9556	0	0	0.00503209	0	0	0	0	0	0.00715235	0.00520171	0	0	0	0	0	0	0	0	0	0	0	0	0	0	0	0	0.00254431	0	0	0	0.000565403	0.000254431	0.000480593	0	0	0	0	0	0
										ASV_25216	0.455687	0.516156	0.456224	0.270743	0.551127	0.380884	0.269952	0.0261499	0.0876657	0.0682441	0.198259	0.174088	0.228592	0.53685	0.677862	0.290363	0.300823	0.686399	0.256128	0.19235	0.585955	0.000424052	0.00537133	0.0172731	0.262262	0.293077	0.0525542	0.00952704	0.0286659	0.00195064	0.254262	0.0307014	0.562859	0.406186	0.00282701	0.430074	0.50171	0.549996	0.755265
										ASV_7683	0	0	0.000961185	0	0	0	0	0	0.00384474	0.00265739	0	0.00206372	0.00149832	0	0	0	0	0	0	0	0	0	0	0	0	0	0.00822661	0.000169621	0.00147005	0	0	0.000593673	0.00356204	0	0	0	0	0	0
										ASV_16968	0	0.00627597	8.48e-05	0.496452	0	0	0.00381647	0.637435	0.71515	0.542221	0	2.83e-05	0	0	0	0	0	0.000141351	0	0	0.000113081	0	0.00616289	0	0.000169621	5.65e-05	0.0203545	0.51822	0.718514	0.796568	0.000480593	0.730275	0.00392955	0.000650213	0.604246	0	0	0	0
										ASV_30733	0.000480593	0.21344	0.00251604	0.00163967	0.00271393	0.00517344	0.00571057	0.00234642	0.0035055	0.00452322	0.00401436	0.00121562	0.000650213	0.00152659	0.000791564	0.0220507	0.00686965	0.0106296	0.0535719	0.0655302	0.0293161	0.117773	0	8.48e-05	0.00534306	0.00562576	0.00158313	0.00506036	0.000819834	0.00514517	0.00469285	0.000395782	0.00333588	0.00865067	0.00265739	0.00709581	0.00579538	0.0117887	0.00876375
										ASV_5619	0.00788737	0.0101207	0.0035055	0.00675657	0.00234642	0.00277048	0.00409917	0.000706754	0.00384474	0.00455149	0.00203545	0.00537133	0.00848104	0.0416419	0.0660673	0.00127216	0.000706754	0.00910299	0.0200153	0.0143047	0.00709581	0.204704	0.000537133	0.0173013	0.0349984	0.0242841	0.0185735	0.000593673	0.000650213	0	0.0089051	0.000706754	0.000537133	0.0146157	0.000197891	0.000367512	0.000593673	0.00257258	0.00178102
										ASV_15433	0	0.00197891	0.0115625	0.000226161	0.00203545	0.00271393	0	0	0.000904645	0.00124389	5.65e-05	0.0013287	0.000254431	0	0	0.0078591	0.00333588	0.0243123	0.0420943	0.0357335	0.00867894	0	0	0.000254431	0.00124389	0.00257258	0.0202697	0.00186583	0.000169621	0.000593673	0.094394	0.000226161	0.00887683	5.65e-05	0	0.00158313	0.00522998	0.0150963	0.00706754
										ASV_14901	0.000197891	0.0461369	0.0106578	0.0156334	0.0229271	0.0603285	0	0.00927261	0.00401436	0.00633251	0.000904645	0.00353377	0.00251604	0	0.000197891	0.0255279	0.0123541	0.051593	0.196591	0.0952987	0.0574449	0.00342069	0.001046	0	0.00466457	0.00466457	0.0277613	0.00873548	0.00421225	0.00842451	0.0587454	0.00384474	0.0197891	0.14463	0.00186583	0.0339242	0.0366381	0.0418964	0.0234925
[truncated: 1 more columns]
