# Supplementary material for: Traditional Chinese medicine improves myasthenia gravis by regulating the symbiotic homeostasis of the intestinal microbiota and host
Source: Front Microbiol. 2023 Jan 6;13:1082565. doi: 10.3389/fmicb.2022.1082565 (PMC9852828; doi:10.3389/fmicb.2022.1082565)
Supplement: Supplementary file 3 [file Table_3.xlsx]

## Sheet: Sheet1
Fig. 3a										Fig. 3b
Sample	Chao1	Faith_pd	Goods_coverage	Observed_species	Pielou_e	Shannon	Simpson	Group			CON1	CON2	CON3	CON4	CON5	CON6	CON7	CON8	CON9	CON10	Case01	Case02	Case03	Case04	Case05	Case06	Case07	Case08	Case09	Case10	Case11	Case12	Case13	Case14	Case15	Case16	Case17	Treat01	Treat02	Treat03	Treat04	Treat05	Treat06	Treat07	Treat08	Treat09	Treat10	Treat11	Treat12
CON1	384.331	24.6239	0.998007	331.8	0.481724	4.03396	0.872991	CON		CON1	0	0.527293	0.572898	0.878321	0.713279	0.707296	0.851066	0.942663	0.940958	0.877465	1.03254	0.935204	0.859046	0.596979	0.685677	0.73856	0.673031	0.623769	0.557726	0.577351	0.528489	1.11441	1.02662	1.22491	0.776884	0.759815	0.959196	0.796015	0.908722	0.81128	0.743044	0.945064	0.765147	0.605805	0.924662	0.707872	0.694124	0.579233	0.707765
CON2	438.928	24.6981	0.997444	359.4	0.499831	4.24314	0.871549	CON		CON2	0.527293	0	0.3996	0.614918	0.368186	0.605303	0.750843	0.64482	0.712039	0.64186	0.91808	0.916374	0.839148	0.435743	0.467057	0.643475	0.682108	0.433294	0.478393	0.630148	0.337788	1.00353	1.17034	1.21563	0.739443	0.686807	0.842252	0.508226	0.672987	0.599432	0.57786	0.654473	0.425897	0.458713	0.6302	0.502521	0.407125	0.39213	0.505892
CON3	1354.19	60.5515	0.991626	1145.7	0.583828	5.93282	0.891798	CON		CON3	0.572898	0.3996	0	0.818148	0.352372	0.470518	0.737917	0.857908	0.780031	0.585932	0.782504	1.02797	0.94949	0.520442	0.629769	0.502672	0.53669	0.613031	0.523819	0.684712	0.519086	1.12531	1.28723	1.33578	0.828497	0.774464	0.854141	0.712465	0.744193	0.760474	0.476228	0.858702	0.369834	0.528678	0.851552	0.255011	0.225459	0.462653	0.671838
CON4	659.602	34.2838	0.99665	583.9	0.607828	5.58566	0.948217	CON		CON4	0.878321	0.614918	0.818148	0	0.581978	0.776278	0.884615	0.289382	0.289249	0.431271	1.1056	1.12465	1.0544	0.718542	0.55013	0.883885	0.943862	0.431862	0.789127	0.956545	0.535673	1.19526	1.37802	1.41923	0.898356	0.852522	1.0576	0.373072	0.291185	0.363138	0.801111	0.174681	0.585957	0.715854	0.354791	0.791684	0.719749	0.549173	0.352506
CON5	1160.64	50.915	0.99276	994	0.589875	5.87342	0.909635	CON		CON5	0.713279	0.368186	0.352372	0.581978	0	0.564542	0.704681	0.610274	0.639118	0.567097	0.901219	1.01124	0.935403	0.441327	0.487949	0.676608	0.742556	0.489358	0.617721	0.804206	0.462981	1.10759	1.28281	1.32352	0.838268	0.787632	0.861644	0.49276	0.596455	0.764826	0.526565	0.620391	0.126466	0.490676	0.607445	0.331302	0.216142	0.342539	0.496361
CON6	911.253	37.9201	0.993806	762.9	0.652222	6.24522	0.967929	CON		CON6	0.707296	0.605303	0.470518	0.776278	0.564542	0	0.535023	0.861123	0.792008	0.58549	0.666358	0.92886	0.85067	0.566029	0.672123	0.407405	0.460185	0.64286	0.505045	0.691129	0.600613	0.954007	1.2035	1.24351	0.641948	0.590237	0.778478	0.707129	0.748428	0.934868	0.39786	0.86417	0.602143	0.426884	0.846282	0.40137	0.429858	0.454063	0.648527
CON7	547.253	30.5548	0.997001	469.3	0.511422	4.53847	0.899185	CON		CON7	0.851066	0.750843	0.737917	0.884615	0.704681	0.535023	0	0.929691	0.897377	0.823854	0.743267	0.91961	0.844073	0.726732	0.825252	0.563409	0.639304	0.779938	0.522718	0.704188	0.766144	0.909838	1.17669	1.22265	0.557473	0.550121	0.777212	0.783994	0.863937	1.04462	0.481014	0.946537	0.737809	0.556858	0.904708	0.670567	0.698234	0.630924	0.798181
CON8	356.348	22.4559	0.997707	280.3	0.528828	4.29964	0.915436	CON		CON8	0.942663	0.64482	0.857908	0.289382	0.610274	0.861123	0.929691	0	0.395509	0.425534	1.14079	1.16006	1.10056	0.742012	0.58784	0.961094	1.0186	0.561426	0.853827	1.01128	0.612826	1.15867	1.36514	1.40776	0.964259	0.919147	1.08073	0.201848	0.360309	0.444461	0.840276	0.230341	0.613977	0.743294	0.098974	0.811941	0.740705	0.634818	0.584994
CON9	952.631	40.8615	0.994394	843.6	0.629125	6.11533	0.961167	CON		CON9	0.940958	0.712039	0.780031	0.289249	0.639118	0.792008	0.897377	0.395509	0	0.31697	1.06395	1.2208	1.15242	0.683567	0.590698	0.889701	0.947446	0.52093	0.83855	1.0284	0.645025	1.31478	1.46281	1.51316	1.04287	0.998997	1.05515	0.506529	0.139622	0.289194	0.78283	0.223917	0.6322	0.770781	0.475323	0.755623	0.683654	0.545515	0.43454
CON10	701.575	37.0108	0.997244	664.2	0.646085	6.05733	0.964167	CON		CON10	0.877465	0.64186	0.585932	0.431271	0.567097	0.58549	0.823854	0.425534	0.31697	0	0.773216	1.15614	1.08816	0.610641	0.582664	0.592934	0.662181	0.558824	0.770551	0.959322	0.584024	1.23633	1.39249	1.4433	0.967878	0.923341	0.972363	0.432624	0.324802	0.532273	0.635095	0.421404	0.550911	0.699255	0.442063	0.482613	0.489761	0.47485	0.569553
Case01	699.587	35.6385	0.995791	596.1	0.364587	3.36121	0.601618	Case		Case01	1.03254	0.91808	0.782504	1.1056	0.901219	0.666358	0.743267	1.14079	1.06395	0.773216	0	0.926707	0.873059	0.828397	0.928155	0.392214	0.545558	0.971518	0.673006	0.762538	0.912706	1.01127	1.18451	1.21969	0.854842	0.864662	0.865384	0.98213	1.00994	1.1983	0.56568	1.1441	0.928103	0.799911	1.11936	0.651512	0.757727	0.819765	0.993122
Case02	414.752	29.5615	0.998352	389.4	0.325669	2.80238	0.52737	Case		Case02	0.935204	0.916374	1.02797	1.12465	1.01124	0.92886	0.91961	1.16006	1.2208	1.15614	0.926707	0	0.0958245	0.790406	0.917069	0.895714	0.692643	1.03619	0.736454	0.650496	0.940229	0.744726	0.459544	0.36546	0.638473	0.706851	0.832893	1.03198	1.1647	1.21892	0.750569	1.185	1.08032	0.848241	1.14364	0.978301	1.00656	0.976038	1.06881
Case03	428.536	27.0716	0.998462	410.4	0.359716	3.12264	0.595207	Case		Case03	0.859046	0.839148	0.94949	1.0544	0.935403	0.85067	0.844073	1.10056	1.15242	1.08816	0.873059	0.0958245	0	0.718241	0.844527	0.820964	0.619006	0.960945	0.664585	0.618913	0.865371	0.76059	0.505437	0.453192	0.564597	0.631938	0.840455	0.968912	1.10055	1.15646	0.671234	1.11988	1.00475	0.775864	1.08377	0.903777	0.931427	0.895923	0.98899
Case04	209.557	13.5593	0.999319	197.8	0.580713	4.42949	0.892151	Case		Case04	0.596979	0.435743	0.520442	0.718542	0.441327	0.566029	0.726732	0.742012	0.683567	0.610641	0.828397	0.790406	0.718241	0	0.233445	0.662883	0.484548	0.526518	0.595878	0.679004	0.444438	0.876485	1.03673	1.07664	0.603544	0.555224	0.87522	0.594511	0.615003	0.757129	0.591598	0.745676	0.471985	0.478265	0.722864	0.524865	0.440667	0.370955	0.563117
Case05	279.765	17.7833	0.999056	265	0.63528	5.11383	0.926157	Case		Case05	0.685677	0.467057	0.629769	0.55013	0.487949	0.672123	0.825252	0.58784	0.590698	0.582664	0.928155	0.917069	0.844527	0.233445	0	0.77523	0.700088	0.349901	0.657845	0.763124	0.37379	0.998607	1.16361	1.20135	0.729776	0.674205	0.952161	0.615915	0.521538	0.597344	0.698509	0.5776	0.510222	0.489369	0.649158	0.624677	0.542149	0.425453	0.375753
Case06	811.261	35.6258	0.996647	762.9	0.606689	5.80923	0.934782	Case		Case06	0.73856	0.643475	0.502672	0.883885	0.676608	0.407405	0.563409	0.961094	0.889701	0.592934	0.392214	0.895714	0.820964	0.662883	0.77523	0	0.25971	0.682345	0.409662	0.586628	0.624195	0.99435	1.16121	1.20707	0.714011	0.705432	0.752904	0.797821	0.838955	0.949632	0.382242	0.962531	0.713009	0.59241	0.941213	0.426715	0.528791	0.555705	0.766454
Case07	613.803	30.4195	0.997453	568.6	0.643815	5.89169	0.946332	Case		Case07	0.673031	0.682108	0.53669	0.943862	0.742556	0.460185	0.639304	1.0186	0.947446	0.662181	0.545558	0.692643	0.619006	0.484548	0.700088	0.25971	0	0.739896	0.451275	0.505322	0.633502	0.786634	0.960062	0.9838	0.500596	0.526987	0.793809	0.857389	0.881695	0.976394	0.448118	1.01902	0.77338	0.632921	1.0009	0.491231	0.590779	0.613833	0.823887
Case08	713.779	29.611	0.997051	666.5	0.638434	5.98879	0.9363	Case		Case08	0.623769	0.433294	0.613031	0.431862	0.489358	0.64286	0.779938	0.561426	0.52093	0.558824	0.971518	1.03619	0.960945	0.526518	0.349901	0.682345	0.739896	0	0.499473	0.67671	0.189104	1.1506	1.29626	1.34355	0.842871	0.790671	0.946892	0.593992	0.492363	0.516028	0.68929	0.506708	0.509107	0.569038	0.624236	0.631163	0.547154	0.287393	0.200099
Case09	707.848	30.441	0.997187	672.5	0.644432	6.05338	0.958256	Case		Case09	0.557726	0.478393	0.523819	0.789127	0.617721	0.505045	0.522718	0.853827	0.83855	0.770551	0.673006	0.736454	0.664585	0.595878	0.657845	0.409662	0.451275	0.499473	0	0.270813	0.411284	0.840741	0.990104	1.03759	0.595381	0.594914	0.614295	0.692646	0.797033	0.780086	0.37993	0.856765	0.676105	0.464378	0.836313	0.578213	0.603527	0.467587	0.649007
Case10	638.374	29.8698	0.996025	544	0.640558	5.821	0.962097	Case		Case10	0.577351	0.630148	0.684712	0.956545	0.804206	0.691129	0.704188	1.01128	1.0284	0.959322	0.762538	0.650496	0.618913	0.679004	0.763124	0.586628	0.505322	0.67671	0.270813	0	0.538523	0.76616	0.902648	0.950872	0.60365	0.624827	0.668996	0.84438	0.976824	0.876663	0.551797	1.01442	0.871807	0.637179	0.994385	0.778843	0.805151	0.665465	0.817487
Case11	639.04	31.1147	0.997266	587.9	0.671721	6.17943	0.956946	Case		Case11	0.528489	0.337788	0.519086	0.535673	0.462981	0.600613	0.766144	0.612826	0.645025	0.584024	0.912706	0.940229	0.865371	0.444438	0.37379	0.624195	0.633502	0.189104	0.411284	0.538523	0	1.05367	1.20113	1.24778	0.737792	0.685487	0.899915	0.560957	0.599361	0.547922	0.652191	0.613704	0.486792	0.518904	0.609677	0.606721	0.523858	0.245949	0.320913
Case12	425.12	16.8563	0.998179	386.4	0.567792	4.87949	0.907967	Case		Case12	1.11441	1.00353	1.12531	1.19526	1.10759	0.954007	0.909838	1.15867	1.31478	1.23633	1.01127	0.744726	0.76059	0.876485	0.998607	0.99435	0.786634	1.1506	0.840741	0.76616	1.05367	0	0.725949	0.702842	0.625739	0.675389	0.79115	1.0389	1.22848	1.28027	0.864954	1.21161	1.16352	0.842877	1.12929	1.09015	1.12122	1.07204	1.16862
Case13	262.77	28.9282	0.998883	240.2	0.246798	1.95167	0.595191	Case		Case13	1.02662	1.17034	1.28723	1.37802	1.28281	1.2035	1.17669	1.36514	1.46281	1.39249	1.18451	0.459544	0.505437	1.03673	1.16361	1.16121	0.960062	1.29626	0.990104	0.902648	1.20113	0.725949	0	0.407053	0.867196	0.943793	0.981214	1.25185	1.39636	1.42229	1.02782	1.40515	1.33724	1.07629	1.33936	1.24617	1.27455	1.24071	1.3333
Case14	325.185	22.3668	0.998194	280.3	0.322638	2.62323	0.62857	Case		Case14	1.22491	1.21563	1.33578	1.41923	1.32352	1.24351	1.22265	1.40776	1.51316	1.4433	1.21969	0.36546	0.453192	1.07664	1.20135	1.20707	0.9838	1.34355	1.03759	0.950872	1.24778	0.702842	0.407053	0	0.909721	0.984333	0.999843	1.29344	1.44201	1.47593	1.06727	1.44855	1.38232	1.12843	1.38409	1.29348	1.32185	1.28619	1.37848
Case15	943.819	46.9528	0.996271	899.5	0.674351	6.61737	0.959306	Case		Case15	0.776884	0.739443	0.828497	0.898356	0.838268	0.641948	0.557473	0.964259	1.04287	0.967878	0.854842	0.638473	0.564597	0.603544	0.729776	0.714011	0.500596	0.842871	0.595381	0.60365	0.737792	0.625739	0.867196	0.909721	0	0.101695	0.812477	0.848144	0.992718	1.03786	0.61152	0.996839	0.889938	0.578327	0.944978	0.815602	0.844397	0.743132	0.84715
Case16	894.66	47.645	0.996246	841.2	0.674718	6.55574	0.954656	Case		Case16	0.759815	0.686807	0.774464	0.852522	0.787632	0.590237	0.550121	0.919147	0.998997	0.923341	0.864662	0.706851	0.631938	0.555224	0.674205	0.705432	0.526987	0.790671	0.594914	0.624827	0.685487	0.675389	0.943793	0.984333	0.101695	0	0.824109	0.80282	0.948733	0.992914	0.617143	0.952607	0.836034	0.525404	0.900055	0.762127	0.790946	0.688349	0.793647
Case17	2623.06	117.966	0.984731	2442.2	0.736119	8.28425	0.987196	Case		Case17	0.959196	0.842252	0.854141	1.0576	0.861644	0.778478	0.777212	1.08073	1.05515	0.972363	0.865384	0.832893	0.840455	0.87522	0.952161	0.752904	0.793809	0.946892	0.614295	0.668996	0.899915	0.79115	0.981214	0.999843	0.812477	0.824109	0	0.932208	1.02107	1.13779	0.554846	1.06701	0.894036	0.735276	1.07161	0.847781	0.873904	0.783744	0.951582
Treat01	604.908	32.5994	0.996415	513.1	0.552977	4.97838	0.936619	Treat		Treat01	0.796015	0.508226	0.712465	0.373072	0.49276	0.707129	0.783994	0.201848	0.506529	0.432624	0.98213	1.03198	0.968912	0.594511	0.615915	0.797821	0.857389	0.593992	0.692646	0.84438	0.560957	1.0389	1.25185	1.29344	0.848144	0.80282	0.932208	0	0.438944	0.542164	0.68706	0.341816	0.528572	0.581072	0.175941	0.661076	0.590351	0.540393	0.621996
Treat02	1248.96	51.7164	0.992245	1070.3	0.650924	6.55075	0.972024	Treat		Treat02	0.908722	0.672987	0.744193	0.291185	0.596455	0.748428	0.863937	0.360309	0.139622	0.324802	1.00994	1.1647	1.10055	0.615003	0.521538	0.838955	0.881695	0.492363	0.797033	0.976824	0.599361	1.22848	1.39636	1.44201	0.992718	0.948733	1.02107	0.438944	0	0.286859	0.751523	0.191832	0.59391	0.705285	0.441342	0.714307	0.643258	0.519811	0.432386
Treat03	318.882	24.8066	0.998143	267.2	0.314251	2.53332	0.622573	Treat		Treat03	0.81128	0.599432	0.760474	0.363138	0.764826	0.934868	1.04462	0.444461	0.289194	0.532273	1.1983	1.21892	1.15646	0.757129	0.597344	0.949632	0.976394	0.516028	0.780086	0.876663	0.547922	1.28027	1.42229	1.47593	1.03786	0.992914	1.13779	0.542164	0.286859	0	0.944724	0.266305	0.785926	0.805493	0.519076	0.901038	0.825968	0.67744	0.506883
Treat04	2216.02	76.2159	0.986309	1967.6	0.733025	8.02089	0.984835	Treat		Treat04	0.743044	0.57786	0.476228	0.801111	0.526565	0.39786	0.481014	0.840276	0.78283	0.635095	0.56568	0.750569	0.671234	0.591598	0.698509	0.382242	0.448118	0.68929	0.37993	0.551797	0.652191	0.864954	1.02782	1.06727	0.61152	0.617143	0.554846	0.68706	0.751523	0.944724	0	0.848749	0.556357	0.491225	0.834789	0.416687	0.443322	0.492886	0.690326
Treat05	758.076	35.3102	0.994965	607.5	0.584993	5.40915	0.953767	Treat		Treat05	0.945064	0.654473	0.858702	0.174681	0.620391	0.86417	0.946537	0.230341	0.223917	0.421404	1.1441	1.185	1.11988	0.745676	0.5776	0.962531	1.01902	0.506708	0.856765	1.01442	0.613704	1.21161	1.40515	1.44855	0.996839	0.952607	1.06701	0.341816	0.191832	0.266305	0.848749	0	0.618451	0.735417	0.308956	0.826065	0.753581	0.618083	0.427356
Treat06	1381.58	57.237	0.990843	1139.5	0.483991	4.91451	0.771315	Treat		Treat06	0.765147	0.425897	0.369834	0.585957	0.126466	0.602143	0.737809	0.613977	0.6322	0.550911	0.928103	1.08032	1.00475	0.471985	0.510222	0.713009	0.77338	0.509107	0.676105	0.871807	0.486792	1.16352	1.33724	1.38232	0.889938	0.836034	0.894036	0.528572	0.59391	0.785926	0.556357	0.618451	0	0.554562	0.609284	0.367622	0.25564	0.351492	0.506844
Treat07	480.108	26.9604	0.997368	418.4	0.521348	4.54021	0.872566	Treat		Treat07	0.605805	0.458713	0.528678	0.715854	0.490676	0.426884	0.556858	0.743294	0.770781	0.699255	0.799911	0.848241	0.775864	0.478265	0.489369	0.59241	0.632921	0.569038	0.464378	0.637179	0.518904	0.842877	1.07629	1.12843	0.578327	0.525404	0.735276	0.581072	0.705285	0.805493	0.491225	0.735417	0.554562	0	0.726783	0.478657	0.504373	0.453913	0.570314
Treat08	145.41	13.3809	0.999084	116.3	0.555658	3.81243	0.902458	Treat		Treat08	0.924662	0.6302	0.851552	0.354791	0.607445	0.846282	0.904708	0.098974	0.475323	0.442063	1.11936	1.14364	1.08377	0.722864	0.649158	0.941213	1.0009	0.624236	0.836313	0.994385	0.609677	1.12929	1.33936	1.38409	0.944978	0.900055	1.07161	0.175941	0.441342	0.519076	0.834789	0.308956	0.609284	0.726783	0	0.804067	0.732984	0.622106	0.650972
Treat09	569.585	32.8001	0.997914	541.8	0.54988	4.99379	0.90316	Treat		Treat09	0.707872	0.502521	0.255011	0.791684	0.331302	0.40137	0.670567	0.811941	0.755623	0.482613	0.651512	0.978301	0.903777	0.524865	0.624677	0.426715	0.491231	0.631163	0.578213	0.778843	0.606721	1.09015	1.24617	1.29348	0.815602	0.762127	0.847781	0.661076	0.714307	0.901038	0.416687	0.826065	0.367622	0.478657	0.804067	0	0.129964	0.468031	0.645525
Treat10	617.101	31.6282	0.997809	593.1	0.56802	5.23267	0.909442	Treat		Treat10	0.694124	0.407125	0.225459	0.719749	0.216142	0.429858	0.698234	0.740705	0.683654	0.489761	0.757727	1.00656	0.931427	0.440667	0.542149	0.528791	0.590779	0.547154	0.603527	0.805151	0.523858	1.12122	1.27455	1.32185	0.844397	0.790946	0.873904	0.590351	0.643258	0.825968	0.443322	0.753581	0.25564	0.504373	0.732984	0.129964	0	0.384275	0.563215
Treat11	909.771	36.6637	0.995505	821.2	0.688726	6.66794	0.973314	Treat		Treat11	0.579233	0.39213	0.462653	0.549173	0.342539	0.454063	0.630924	0.634818	0.545515	0.47485	0.819765	0.976038	0.895923	0.370955	0.425453	0.555705	0.613833	0.287393	0.467587	0.665465	0.245949	1.07204	1.24071	1.28619	0.743132	0.688349	0.783744	0.540393	0.519811	0.67744	0.492886	0.618083	0.351492	0.453913	0.622106	0.468031	0.384275	0	0.281344
Treat12	1025.61	36.8969	0.99548	952	0.7178	7.10246	0.97602	Treat		Treat12	0.707765	0.505892	0.671838	0.352506	0.496361	0.648527	0.798181	0.584994	0.43454	0.569553	0.993122	1.06881	0.98899	0.563117	0.375753	0.766454	0.823887	0.200099	0.649007	0.817487	0.320913	1.16862	1.3333	1.37848	0.84715	0.793647	0.951582	0.621996	0.432386	0.506883	0.690326	0.427356	0.506844	0.570314	0.650972	0.645525	0.563215	0.281344	0
Treat13	978.99	30.1488	0.994914	892.1	0.600559	5.88611	0.923806	Treat		Treat13	0.780607	0.350833	0.636293	0.480361	0.567132	0.856074	0.980464	0.6787	0.54865	0.725946	1.13219	1.1359	1.06221	0.656682	0.471173	0.883082	0.925828	0.385189	0.724416	0.880004	0.439993	1.22383	1.38943	1.43546	0.9458	0.893583	1.09557	0.759231	0.580922	0.45875	0.847945	0.561826	0.591183	0.699679	0.741009	0.735638	0.639965	0.539397	0.335406
[truncated: 1 more columns]
