# Supplementary material for: Traditional Chinese medicine improves myasthenia gravis by regulating the symbiotic homeostasis of the intestinal microbiota and host
Source: Front Microbiol. 2023 Jan 6;13:1082565. doi: 10.3389/fmicb.2022.1082565 (PMC9852828; doi:10.3389/fmicb.2022.1082565)
Supplement: Supplementary file 4 [file Table_4.xlsx]

## Sheet: Sheet1
Fig. 4a							Fig. 4b
Taxa	Abundace	Group	LDA_score	Pvalue			sample	CON1	CON2	CON3	CON4	CON5	CON6	CON7	CON8	CON9	CON10	Case01	Case02	Case03	Case04	Case05	Case06	Case07	Case08	Case09	Case10	Case11	Case12	Case13	Case14	Case15	Case16	Case17	Treat01	Treat02	Treat03	Treat04	Treat05	Treat06	Treat07	Treat08	Treat09	Treat10	Treat11	Treat12	Treat13
Bacteria.Proteobacteria.Betaproteobacteria.Neisseriales.Neisseriaceae.Eikenella	0.381083			-			Bacteroides	0.45656	0.518005	0.452787	0.271418	0.552554	0.3776	0.270936	0.0245995	0.0868065	0.068062	0.197137	0.173875	0.229087	0.538057	0.675817	0.290565	0.300659	0.684826	0.255318	0.191855	0.583673	0.000430483	0.0049627	0.0181799	0.26112	0.294498	0.0526847	0.00936855	0.0278266	0.00224049	0.254957	0.029663	0.562842	0.405873	0.00309038	0.430531	0.501705	0.54876	0.755667	0.791095
Bacteria.Firmicutes.Bacilli.Lactobacillales.Streptococcaceae	3.6642			-			Prevotella	0	0.00672089	7.19166e-05	0.495284	0	0	0.00343243	0.636078	0.716801	0.542561	0	2.03529e-05	0	0	0	2.10234e-05	0	0.000112138	0	0	0.000141319	0	0.00568058	0	0.000122755	5.95427e-05	0.0205056	0.519793	0.719408	0.795563	0.000442546	0.72827	0.00401993	0.000609541	0.60334	0	0	0	0	0
Bacteria.Firmicutes.Bacilli.Lactobacillales.Lactobacillaceae.Lactobacillus.Lactobacillus_ruminis	1.75514			-			Faecalibacterium	0.0660314	0.00755157	0.19826	0.00104496	0.0809311	0.193968	0.118672	0.00197729	0.104443	0.261016	0.649525	0.012171	0.0150195	0.121615	0.0584668	0.387651	0.279494	0.0441599	0.0763321	0.0444335	0.0284523	0	0.00010404	9.43594e-05	0	0.000119085	0.0749609	0.0361199	0.112072	0.0190807	0.121819	0.0284066	0.0997827	0.0504565	0	0.109054	0.132187	0.114133	0.0448802	0.000104723
Bacteria.Firmicutes.Clostridia.Clostridiales.Lachnospiraceae.Anaerostipes	2.44543			-			Shigella	7.16435e-05	8.63036e-05	0.000100683	0.000312131	0.00018293	1.56843e-05	0.00020444	0.00119651	0.00127754	0.00420383	0.000131451	0.727617	0.671815	0.194442	0.0960499	0.00073582	0.0476663	0.00226518	0.00315383	0.00140098	0.00188426	0.012598	0.548779	0.00707696	0.137772	0.115791	0.000658816	0	0.000468032	0.000760726	3.4042e-05	7.99543e-05	0.000221161	0.0145342	0.00338011	0.000227353	0.000241708	0.000173866	0.000304015	0.00186756
Bacteria.Actinobacteria.Actinobacteria.Actinomycetales.Micrococcaceae.Arthrobacter	1.48003			-			Megamonas	0.000179109	0.0246505	0	0.125762	0.0804585	0	0.00159248	0.300771	0	0	3.94353e-05	0	0	0	0	0	0	0	0	0	0	0	0.00177908	0	0	0	0	0.311747	0.0051909	0	0.0285953	0.145631	0.101955	0.000108363	0.380137	0	0	0	0	0
Bacteria.Synergistetes.Synergistia.Synergistales.Dethiosulfovibrionaceae.Pyramidobacter	0.564902			-			Roseburia	0	0.00823121	0.0558504	0.0189586	0.0723792	0.0213463	0.000322799	0.00196715	0.000846164	0.000867457	0.000276047	0.0210856	0.0202281	0	0	0.0159778	0.00866459	0.00827577	0.0402884	0.0392116	0.0136844	0	0.000353736	0.00191864	0.0102705	0.0145284	0.0108087	0.0474268	0.0117008	0.00350142	0.137019	0.00591662	0.0403944	0.0742557	0	0.145001	0.123728	0.0363573	0.0162648	0
Bacteria.Proteobacteria.Gammaproteobacteria.Xanthomonadales.Xanthomonadaceae.Stenotrophomonas.Stenotrophomonas_geniculata	1.79717			-			Bifidobacterium	0.191861	0.069442	0.0833945	0.000203564	0.00190552	0.000501898	0.00370143	0.000588116	0.000199097	0.00111212	0	0.000651293	0.000179606	0.0120461	0.00608303	0.0420048	0.0455057	0.034359	0.0671314	0.123255	0.0563865	0	0	0.000178234	0.00272106	0.00418784	0.0106028	0.000559131	0.000156011	0.0903075	0.00255315	0.00153055	0.00555505	0.00155772	0.000231779	0.00656798	0.00784208	0.0168264	0.00435121	0.0720843
Bacteria.Firmicutes.Clostridia.Clostridiales.Dehalobacteriaceae	1.68523			-			Sutterella	0.000131346	0	0.00824164	0.0108296	0.0105947	0.0875184	0.0115562	0.00273778	0.00376626	0.00556062	0.00400925	0.0014247	0.00231242	0	0	0.00702182	0.00595278	0.0767023	0.118707	0.0767994	0.0658784	0.0346792	4.16159e-05	8.3875e-05	0.035517	0.0312202	0.011344	0.002075	0.00343224	8.33672e-05	0.00134466	0.00411194	0.00573718	0.000121908	0.00244334	0.00649219	0.00563986	0.0469052	0.0258223	0.0077146
Bacteria.Proteobacteria.Gammaproteobacteria.Enterobacteriales.Enterobacteriaceae.Providencia	1.68877			-			Enterococcus	0.188434	0.00103564	5.75333e-05	0.000135709	0	0	0	0	0	0	0	0	0	0.00296709	0.00278967	0	0	0	9.48519e-05	4.77608e-05	0	0	0.400647	0	0.00773354	0.010162	0	0	0	0	0	0	0	0.023447	0	0	0	0.00113979	0.00041802	0
Bacteria.Proteobacteria.Gammaproteobacteria.Enterobacteriales.Enterobacteriaceae.Pseudomonas.Pseudomonas_syringae	2.23059	Case	3.32598	0.0217523			[Ruminococcus]	0.00813154	0.00970916	0.0037972	0.00707045	0.00228662	0.00228991	0.00391663	0.000851754	0.00379944	0.00498232	0.00203749	0.00529176	0.00808226	0.0421612	0.0672621	0.00124038	0.000639372	0.00924015	0.0198715	0.0142964	0.00706597	0.204695	0.000520199	0.0167436	0.0351283	0.0239759	0.0184674	0.000497006	0.000822602	0	0.00908921	0.000571102	0.000429313	0.0142633	0.000164177	0.000328399	0.000590842	0.00249208	0.00186209	0.0450309
Bacteria.Acidobacteria.Solibacteres.Solibacterales.Solibacteraceae.Candidatus_Solibacter	0.38881			-			Fusobacterium	0	0	0	0.000257847	6.09765e-05	0	0.0079839	7.09795e-05	0	0	0.00324684	0.00337858	0.00374927	0	0	0.000147164	0	0	0	0	0	0.0795255	0	0	0.18002	0.204549	0	0	0.000723322	0.000646096	0	0	0	0.0780619	0	0	0	0	0	0.000802876
Bacteria.Bacteroidetes.Bacteroidia.Bacteroidales.Bacteroidaceae.Bacteroides	5.5219			-			Lachnospira	0	0	0.0168716	0.00287703	0.0627601	0.0374384	9.68398e-05	0.00114581	0.00126095	0.00137903	0	0.000427411	0	0	0	0.0930707	0.0369292	0.00215305	0.00962747	0.0554821	0.0141084	0	0	0	0.000756987	0.0012107	0.00172939	0.0119778	0.0125518	0.00773231	0.00873177	0.000731011	0.0215827	0.0351909	0	0.00510281	0.00762723	0.00552507	0.0041422	0
Bacteria.Proteobacteria.Alphaproteobacteria.Rhizobiales.Phyllobacteriaceae	1.71806			-			[Eubacterium]	0.000800019	0.00236256	0	0.000108567	0	0	0.0001614	0	0.00023228	0	0.000184031	0.00111941	0.00092048	0	0.000484318	0	0	0	0	0	0	0.248883	0.00015606	0.0389285	0.000102296	0.000138933	0.0386437	0.00289506	0	0	0	0	0.000325237	0	0.000106232	0	0	0.000115911	0	0.000733061
Bacteria.Firmicutes.Bacilli.Lactobacillales.Lactobacillaceae.Lactobacillus.Lactobacillus_hamsteri	1.00296			-			Gemmiger	0	0	0.000431499	0.000407127	0.00125002	0.0230716	0	0.000446157	0.00179188	0.00229098	0	0	0	0	0	0	0	0.00269131	0.000758815	0.00173531	0.00480486	0	0	6.29063e-05	0	0	0.00380878	0.00129221	0.00446758	0.00849303	0.00658712	0	0.00706415	0	0	0.169959	0.0852961	0.00461711	0.00182409	0
Bacteria.Firmicutes.Bacilli.Bacillales.Bacillaceae.Bacillus	0.689841			-			Blautia	0	0.0261068	0.00520676	0.00213063	0.00632632	0.0220051	0.00236719	0.000111539	0.000978896	0.00184613	0.00147225	0.00168929	0.00134704	0.000106602	3.87454e-05	0.0203507	0.00564411	0.00616758	0.0282422	0.0104755	0.00770191	0	0.000124848	0.0030195	0.00646508	0.0119681	0.0215968	0.0023235	0.00121972	0.00169861	0.0221613	0.000696745	0.00281005	0.0152927	0	0.016622	0.0245468	0.0202264	0.00784739	0.0131253
Bacteria.Acidobacteria.Solibacteres	0.730007			-			Coprococcus	0	0.00202813	0.0116505	0.000244276	0.00196649	0.00315255	5.37999e-05	0	0.000895938	0.00126782	0.000118306	0.00132294	0.000269409	0	0	0.00815709	0.00339529	0.0238181	0.0427071	0.0362186	0.00866759	0	0	0.000293563	0.00112525	0.00256034	0.0204027	0.00195075	0.000198559	0.000541887	0.0963218	0.000239863	0.00879441	0.000108363	0	0.00154095	0.00526387	0.0152809	0.00703034	0.00446818
Bacteria.Bacteroidetes	5.77783	Treat	5.18826	0.00128359			Oscillospira	0.000191049	0.0227518	0.00703344	0.00848182	0.000929892	0.00021958	0.000236719	0	0.0111495	0.012656	0.00318111	0.00154682	0.00251448	0	0	0.00409957	0.00315277	0.000784965	0.000165991	0.000302485	0.00157807	0	0.000332928	0	0.022505	0.0262186	0.111587	0.000273353	0.00364498	4.16836e-05	0.01057	0.000799543	0.00317431	0.000839813	2.89724e-05	0.00469863	0.0035182	0.00631713	0.00440822	0.00673718
Bacteria.Proteobacteria.Gammaproteobacteria.Aeromonadales.Succinivibrionaceae.Anaerobiospirillum	0.852049			-			Dorea	0.000191049	0.00499482	0.00548004	0.00151994	0.00489337	0.00625804	0.00144184	0.00113567	0.000165915	0.000645032	0	0.00286976	0.00269409	0.00369554	0.00497879	0.00443594	0.00123465	0.0102718	0.0282422	0.0407718	0.0120828	5.06451e-05	0	0.000188719	0.00251647	0.00152826	0.0269497	0.00238563	0.00456686	0.00136514	0.00782965	0.000833809	0.0015091	0	4.82873e-05	0.0103572	0.012918	0.00664555	0.00326816	0.000191992
Bacteria.Bacteroidetes.Bacteroidia.Bacteroidales.Porphyromonadaceae.Macellibacteroides.Macellibacteroides_fermentans	1.34788			-			Dialister	0	0	0.0104567	0.00751829	0.00582326	0.000454845	0.00011836	0	0.00482811	0.00869681	0.00436417	0.000346	0.000157155	0	0	0	0	0.000627972	0.000497973	0.00187859	0.00678333	0	0.000135252	0	0.00578993	0.00726421	0.0267438	0.00048458	0.00445339	9.37881e-05	0	0.0116048	0.00945789	0	0	0.000126307	0	0.0504598	0.0345437	0.000122177
Bacteria.Proteobacteria.Gammaproteobacteria.Cardiobacteriales.Cardiobacteriaceae.Suttonella.Suttonella_ornithocola	0.368288			-			Phascolarctobacterium	0.000859722	0.00163977	0.00012945	0.000922822	0.000594521	0.0243577	0	0.000365038	0	0.000400365	0	0.010441	0.00918234	0.0465496	0.033941	0.00819913	0.0105607	0	0	0	0	0.00858434	3.1212e-05	0.00261061	0.000204591	0.000218323	0.000185292	0.000670957	0.0111193	0.00144851	0.0085956	0.000262707	0	0	0.000193149	0.0100288	0.0089432	0	0	0
Bacteria.Firmicutes.Clostridia.Clostridiales.Lachnospiraceae.Lachnoanaerobaculum	0.723362			-
Bacteria.Firmicutes.Bacilli.Bacillales.Planococcaceae	1.7042			-
Bacteria.Proteobacteria.Gammaproteobacteria.Pasteurellales.Pasteurellaceae.Actinobacillus.Actinobacillus_parahaemolyticus	1.41355			-
Bacteria.Firmicutes.Bacilli.Lactobacillales.Lactobacillaceae.Lactobacillus.Lactobacillus_iners	1.36471	CON	4.15026	0.00141968
Bacteria.Firmicutes.Clostridia.Clostridiales.Ruminococcaceae	5.13894			-
Bacteria.Firmicutes.Bacilli.Lactobacillales.Lactobacillaceae.Lactobacillus	2.91075			-
Bacteria.Bacteroidetes.Flavobacteriia.Flavobacteriales.Flavobacteriaceae	1.05813			-
Bacteria.Firmicutes.Clostridia.Clostridiales.Clostridiaceae.SMB53	2.01218			-
Bacteria.Firmicutes.Erysipelotrichi.Erysipelotrichales	4.30646	Case	3.93056	0.042982
Bacteria.Lentisphaerae._Lentisphaeria_.Victivallales	2.45036			-
Bacteria.Firmicutes.Bacilli.Lactobacillales.Enterococcaceae.Melissococcus.Melissococcus_plutonius	1.24867			-
Bacteria.Actinobacteria.Actinobacteria.Actinomycetales.Corynebacteriaceae	2.21036	Case	3.60406	0.0235768
Bacteria.Proteobacteria.Epsilonproteobacteria.Campylobacterales.Campylobacteraceae	1.70039			-
Bacteria.Firmicutes.Clostridia.Clostridiales.Ruminococcaceae.Butyricicoccus.Butyricicoccus_pullicaecorum	2.97641			-
Bacteria.Bacteroidetes.Bacteroidia.Bacteroidales.Bacteroidaceae.Bacteroides.Bacteroides_fragilis	2.99723			-
Bacteria.Proteobacteria.Alphaproteobacteria.Caulobacterales.Caulobacteraceae.Nitrobacteria.Nitrobacteria_hamadaniensis	0.765636			-
Bacteria.Proteobacteria.Deltaproteobacteria.Desulfovibrionales.Desulfovibrionaceae.Desulfovibrio.Desulfovibrio_oxamicus	1.33844			-
Bacteria.Firmicutes.Bacilli.Bacillales.Planococcaceae.Kurthia	1.43706			-
Bacteria.Firmicutes.Clostridia.Clostridiales.Ruminococcaceae.Butyricicoccus	2.97641			-
Bacteria.Proteobacteria.Gammaproteobacteria.Enterobacteriales.Enterobacteriaceae.Cronobacter.Cronobacter_dublinensis	2.3972			-
Bacteria.Firmicutes.Clostridia.Clostridiales.Lachnospiraceae.Lachnoanaerobaculum.Lachnoanaerobaculum_orale	0.723362			-
Bacteria.Firmicutes.Clostridia.Clostridiales.Lachnospiraceae.Lachnospira	4.10299			-
Bacteria.Proteobacteria.Gammaproteobacteria.Pasteurellales	3.04517			-
Bacteria.Proteobacteria.Gammaproteobacteria.Enterobacteriales	5.40069	Case	5.0453	1.7061e-05
Bacteria.Firmicutes.Clostridia.Clostridiales.Veillonellaceae.Anaerosinus.Anaerosinus_glycerini	0.474089			-
Bacteria.Proteobacteria.Gammaproteobacteria.Pseudomonadales.Moraxellaceae.Acinetobacter	3.63882	Case	3.37991	0.00181889
Bacteria.Bacteroidetes.Bacteroidia.Bacteroidales.Bacteroidaceae.Bacteroides.Bacteroides_ovatus	4.5097			-
Bacteria.Firmicutes.Clostridia.Clostridiales._Tissierellaceae_.Anaerococcus	0.775995			-
Bacteria.Bacteroidetes.Bacteroidia.Bacteroidales.Rikenellaceae.Alistipes.Alistipes_massiliensis	0.991795			-
Bacteria.Actinobacteria.Thermoleophilia.Solirubrobacterales.Solirubrobacteraceae	0.631849			-
Bacteria.Proteobacteria.Alphaproteobacteria.Rhizobiales.Hyphomicrobiaceae	2.08694			-
Bacteria.Firmicutes.Clostridia.Clostridiales.Ruminococcaceae.Oscillospira	4.0199			-
Bacteria.Actinobacteria.Actinobacteria.Actinomycetales.Nocardiaceae.Rhodococcus	1.4302			-
Bacteria.Firmicutes.Clostridia.Clostridiales.Lachnospiraceae.Blautia.Blautia_obeum	3.14651	Treat	2.95189	0.00379927
Bacteria.Proteobacteria.Alphaproteobacteria.Rhizobiales	2.29783			-
Bacteria.Proteobacteria.Alphaproteobacteria.Rhodospirillales.Acetobacteraceae	0.722841			-
Bacteria.Proteobacteria.Deltaproteobacteria.Desulfovibrionales	2.78346			-
Bacteria.Proteobacteria.Betaproteobacteria.Burkholderiales.Oxalobacteraceae	2.28924			-
Bacteria.Proteobacteria.Epsilonproteobacteria	1.77093			-
Bacteria.Proteobacteria.Gammaproteobacteria.Thiotrichales	0.421363			-
Bacteria.Firmicutes.Clostridia.Clostridiales.Ruminococcaceae.Anaerofilum	0.458889			-
Bacteria.Proteobacteria.Gammaproteobacteria.Pasteurellales.Pasteurellaceae.Aggregatibacter.Aggregatibacter_segnis	2.78478			-
Bacteria.Cyanobacteria	1.44951			-
Bacteria.Firmicutes.Clostridia.Clostridiales.Veillonellaceae.Selenomonas.Selenomonas_bovis	0.685225			-
Bacteria.Proteobacteria.Deltaproteobacteria.Desulfovibrionales.Desulfovibrionaceae.Desulfovibrio.Desulfovibrio_D168	1.69929			-
Bacteria.Proteobacteria.Gammaproteobacteria.Pasteurellales.Pasteurellaceae.Actinobacillus	2.2893			-
Bacteria.Synergistetes.Synergistia.Synergistales.TTA_B6	0.786751			-
Bacteria.Firmicutes.Bacilli.Lactobacillales.Leuconostocaceae	2.8509			-
Bacteria.Firmicutes.Erysipelotrichi.Erysipelotrichales.Erysipelotrichaceae.Bulleidia	1.02505			-
Bacteria.Acidobacteria.BPC102	0.379207			-
Bacteria.Proteobacteria.Gammaproteobacteria.Cardiobacteriales.Cardiobacteriaceae.Cardiobacterium	0.983144			-
Bacteria.Proteobacteria.Alphaproteobacteria.Rhizobiales.Methylobacteriaceae.Methylobacterium	0.272531			-
Bacteria.Proteobacteria.Betaproteobacteria.MND1	0.378056			-
Bacteria.Proteobacteria.Alphaproteobacteria.Rhizobiales.Hyphomicrobiaceae.Devosia	2.07746			-
Bacteria.Verrucomicrobia.Verrucomicrobiae.Verrucomicrobiales.Verrucomicrobiaceae.Akkermansia.Akkermansia_muciniphila	2.54037			-
Bacteria.Firmicutes.Bacilli.Bacillales.Staphylococcaceae.Staphylococcus.Staphylococcus_sciuri	1.21339			-
Bacteria.Synergistetes.Synergistia.Synergistales.Dethiosulfovibrionaceae	0.564902			-
Bacteria.Bacteroidetes.Bacteroidia.Bacteroidales.S24_7	2.21533			-
Bacteria.Firmicutes.Bacilli.Lactobacillales.Streptococcaceae.Streptococcus.Streptococcus_agalactiae	1.47368			-
Bacteria.Proteobacteria.Alphaproteobacteria.Sphingomonadales.Sphingomonadaceae.Sphingomonas	0.332842			-
Bacteria.Fusobacteria.Fusobacteriia.Fusobacteriales.Fusobacteriaceae	4.7448			-
Bacteria.Bacteroidetes.Bacteroidia.Bacteroidales.Rikenellaceae	3.74036			-
Bacteria.Proteobacteria.Gammaproteobacteria.Pseudomonadales.Pseudomonadaceae	3.92155	Case	3.63076	0.0331705
Bacteria.Nitrospirae.Nitrospira.Nitrospirales	0.267215			-
Bacteria.Proteobacteria.Gammaproteobacteria.Pseudomonadales.Pseudomonadaceae.Pseudomonas	3.91178	Case	3.62239	0.0353209
Bacteria.Chloroflexi.Chloroflexi	0.368288			-
Bacteria.Proteobacteria.Gammaproteobacteria.Xanthomonadales.Xanthomonadaceae.Lysobacter	0.445568			-
Bacteria.Proteobacteria.Betaproteobacteria.Neisseriales.Neisseriaceae	1.863			-
Bacteria.Firmicutes.Clostridia.Clostridiales.Peptostreptococcaceae._Clostridium_	2.06887			-
Bacteria.Firmicutes.Bacilli.Lactobacillales.Lactobacillaceae.Lactobacillus.Lactobacillus_salivarius	2.65861	CON	3.36471	0.00878498
Bacteria.Actinobacteria.Actinobacteria.Bifidobacteriales.Bifidobacteriaceae.Bifidobacterium.Bifidobacterium_longum	4.45815			-
Bacteria.Proteobacteria.Alphaproteobacteria.Rhizobiales.Rhizobiaceae.Agrobacterium	0.828144			-
Bacteria.Proteobacteria.Gammaproteobacteria.Enterobacteriales.Enterobacteriaceae.Proteus.Proteus_vulgaris	1.94933			-
Bacteria.Actinobacteria.Actinobacteria.Actinomycetales.Actinomycetaceae.Actinomyces	2.38588			-
Bacteria.Firmicutes.Clostridia.Clostridiales.Clostridiaceae.Clostridium.Clostridium_paraputrificum	0.851133			-
Bacteria.Bacteroidetes.Bacteroidia.Bacteroidales._Odoribacteraceae_.Odoribacter	2.4198			-
Bacteria.Actinobacteria.Actinobacteria.Actinomycetales.Actinomycetaceae.Actinomyces.Actinomyces_hyovaginalis	1.18469			-
Bacteria.Firmicutes.Clostridia.Clostridiales._Mogibacteriaceae_	2.58964			-
Bacteria.Actinobacteria.Actinobacteria.Bifidobacteriales.Bifidobacteriaceae	4.54839			-
Bacteria.Firmicutes.Erysipelotrichi.Erysipelotrichales.Erysipelotrichaceae.Clostridium.Clostridium_ramosum	2.37729			-
Bacteria.Firmicutes.Bacilli.Lactobacillales.Streptococcaceae.Streptococcus	3.54389			-
Bacteria.Firmicutes.Clostridia.Clostridiales.Peptostreptococcaceae.Clostridium.Clostridium_bartlettii	1.35756			-
Bacteria.Nitrospirae.Nitrospira.Nitrospirales.Nitrospiraceae.Nitrospira	0.267215			-
Bacteria.Proteobacteria.Deltaproteobacteria.Syntrophobacterales	0.307066			-
Bacteria.Actinobacteria.Actinobacteria.Bifidobacteriales.Bifidobacteriaceae.Scardovia	1.23415			-
Bacteria.Actinobacteria.Actinobacteria.Actinomycetales.Microbacteriaceae.Labedella.Labedella_gwakjiensis	0.204992			-
Bacteria.Bacteroidetes.Flavobacteriia.Flavobacteriales._Weeksellaceae_	0.743662			-
Bacteria.Bacteroidetes._Saprospirae_._Saprospirales_.Saprospiraceae.Aquirestis	0.379207			-
Bacteria.Firmicutes.Clostridia.Clostridiales.Lachnospiraceae.Roseburia.Roseburia_faecis	3.96965			-
Bacteria.Proteobacteria.Betaproteobacteria.Burkholderiales.Oxalobacteraceae.Oxalobacter	1.48111			-
Bacteria.Actinobacteria.Actinobacteria.Actinomycetales.Brevibacteriaceae.Brevibacterium.Brevibacterium_casei	1.38858			-
Bacteria.Firmicutes.Clostridia.Clostridiales.Veillonellaceae.Selenomonas	0.906099			-
Bacteria.Proteobacteria.Betaproteobacteria.Burkholderiales.Comamonadaceae.Aquabacterium	1.20011			-
Bacteria.Proteobacteria.Gammaproteobacteria.Pseudomonadales	4.1091	Case	3.82843	0.00881461
Bacteria.Actinobacteria.Actinobacteria.Bifidobacteriales.Bifidobacteriaceae.Bifidobacterium.Bifidobacterium_animalis	1.64432			-
Bacteria.Firmicutes.Bacilli.Turicibacterales.Turicibacteraceae	2.16023			-
Bacteria.Firmicutes.Bacilli.Bacillales.Thermoactinomycetaceae.Thermoactinomyces.Thermoactinomyces_sanguinis	1.67238			-
Bacteria.Spirochaetes.Spirochaetes	1.72937			-
Bacteria.Actinobacteria.Actinobacteria.Actinomycetales	2.73387			-
Bacteria.Proteobacteria.Alphaproteobacteria.Rhizobiales.Hyphomicrobiaceae.Hyphomicrobium	0.421363			-
Bacteria.Firmicutes.Clostridia.Clostridiales.Lachnospiraceae.Dorea	3.9234			-
Bacteria.Bacteroidetes.Sphingobacteriia.Sphingobacteriales.Sphingobacteriaceae	0.641953			-
Bacteria.Firmicutes.Clostridia.Clostridiales.Christensenellaceae	2.48622			-
Bacteria.Firmicutes.Erysipelotrichi.Erysipelotrichales.Erysipelotrichaceae._Eubacterium_._Eubacterium__dolichum	4.23309			-
Bacteria.Proteobacteria.Gammaproteobacteria.Aeromonadales.Aeromonadaceae.Aeromonas	2.44091	Case	2.63033	0.00226972
Bacteria.Actinobacteria.Coriobacteriia.Coriobacteriales.Coriobacteriaceae.Adlercreutzia	1.44681			-
Bacteria.Firmicutes.Clostridia.Clostridiales.Peptostreptococcaceae.Clostridium	1.4699			-
Bacteria.Firmicutes.Bacilli.Lactobacillales.Streptococcaceae.Streptococcus.Streptococcus_equi	1.22197			-
Bacteria.Spirochaetes	1.72937			-
Bacteria.Synergistetes.Synergistia	0.990871			-
Bacteria.Proteobacteria.Betaproteobacteria.Burkholderiales.Comamonadaceae	2.5391			-
Bacteria.Actinobacteria.Actinobacteria.Bifidobacteriales.Bifidobacteriaceae.Bifidobacterium	4.54766			-
Bacteria.Proteobacteria.Epsilonproteobacteria.Campylobacterales.Helicobacteraceae	0.946794	CON	3.99474	0.0461009
Bacteria.Proteobacteria.Gammaproteobacteria.Pasteurellales.Pasteurellaceae.Haemophilus.Haemophilus_parainfluenzae	2.79144			-
Bacteria.Proteobacteria.Gammaproteobacteria.Vibrionales	0.381468			-
Bacteria.Firmicutes.Bacilli.Bacillales.Bacillaceae	1.58981			-
Bacteria.Firmicutes.Clostridia.Clostridiales.Peptococcaceae.Peptococcus	0.484133			-
Bacteria.Firmicutes.Clostridia.Clostridiales.Veillonellaceae.Acidaminococcus	2.66961			-
Bacteria.Acidobacteria.BPC102.MVS_40	0.379207			-
Bacteria.Proteobacteria.Deltaproteobacteria.Desulfovibrionales.Desulfovibrionaceae	2.78346			-
Bacteria.Proteobacteria.Gammaproteobacteria.Aeromonadales	2.46381	Case	2.76883	0.00170394
Bacteria.Chloroflexi	1.11999			-
Bacteria.Proteobacteria.Gammaproteobacteria.Oceanospirillales.Halomonadaceae	2.84847	Case	2.67787	0.00381102
Bacteria.Firmicutes.Clostridia.Clostridiales.Peptostreptococcaceae._Clostridium_._Clostridium__difficile	2.05485			-
Bacteria.Chloroflexi.Thermomicrobia	0.932879			-
Bacteria.Actinobacteria.Coriobacteriia.Coriobacteriales.Coriobacteriaceae.Collinsella.Collinsella_stercoris	0.639879			-
Bacteria.TM7.TM7_3	2.01091			-
Bacteria.TM7.TM7_1	0.357771			-
Bacteria.Proteobacteria.Gammaproteobacteria.Pseudomonadales.Moraxellaceae.Psychrobacter	1.628			-
Bacteria.Nitrospirae.Nitrospira	0.267215			-
Bacteria.Firmicutes.Clostridia.Clostridiales.Peptostreptococcaceae	3.34776			-
Bacteria.Spirochaetes.Spirochaetes.Spirochaetales	1.72937			-
Bacteria.Proteobacteria.Gammaproteobacteria.Xanthomonadales.Xanthomonadaceae.Dyella	0.831579			-
Bacteria.Verrucomicrobia	2.54037			-
Bacteria.Firmicutes.Clostridia.Clostridiales.Lachnospiraceae.Lachnobacterium	2.41701			-
Bacteria.Chloroflexi.Anaerolineae	0.589545			-
Bacteria.Firmicutes.Erysipelotrichi.Erysipelotrichales.Erysipelotrichaceae.Bulleidia.Bulleidia_moorei	1.02505			-
Bacteria.Firmicutes.Bacilli.Lactobacillales.Leuconostocaceae.Weissella.Weissella_viridescens	1.35266	CON	3.93212	0.0461009
Bacteria.Proteobacteria.Alphaproteobacteria.RF32	1.96026			-
Bacteria.Bacteroidetes.Bacteroidia.Bacteroidales.Bacteroidaceae.Bacteroides.Bacteroides_caccae	3.12262			-
Bacteria.Proteobacteria.Gammaproteobacteria.Pseudomonadales.Moraxellaceae.Alkanindiges.Alkanindiges_illinoisensis	1.83266			-
Bacteria.Proteobacteria.Gammaproteobacteria.Xanthomonadales.Sinobacteraceae.Steroidobacter	1.0172			-
Bacteria.Actinobacteria.Actinobacteria.Actinomycetales.Brevibacteriaceae.Brevibacterium	1.38858			-
Bacteria.Proteobacteria.Epsilonproteobacteria.Campylobacterales.Helicobacteraceae.Flexispira	0.946794	CON	4.12354	0.0461009
Bacteria.Proteobacteria.Betaproteobacteria.Neisseriales.Neisseriaceae.Neisseria	1.72351			-
Bacteria.Proteobacteria.Betaproteobacteria.Neisseriales.Neisseriaceae.Snodgrassella.Snodgrassella_alvi	0.942049			-
Bacteria.Firmicutes.Clostridia.Clostridiales.Veillonellaceae.Mitsuokella	2.99504			-
Bacteria.OP8	0.962843			-
Bacteria.Proteobacteria	5.47296	Case	5.10334	1.47554e-06
Bacteria.Actinobacteria.Actinobacteria.Actinomycetales.Microbacteriaceae	0.916022			-
Bacteria.Bacteroidetes.Bacteroidia.Bacteroidales.Bacteroidaceae.Bacteroides.Bacteroides_nordii	0.90184			-
Bacteria.Bacteroidetes.Bacteroidia.Bacteroidales.Bacteroidaceae	5.5219			-
Bacteria.Proteobacteria.Gammaproteobacteria.Xanthomonadales.Xanthomonadaceae.Stenotrophomonas	2.02745	Case	2.84808	0.0235768
Bacteria.Firmicutes.Bacilli.Bacillales.Staphylococcaceae.Macrococcus	1.82919			-
Bacteria.Proteobacteria.Alphaproteobacteria.Rhizobiales.Rhizobiaceae	0.935607			-
Bacteria.Proteobacteria.Alphaproteobacteria.Rhodobacterales	1.15937			-
Bacteria.Firmicutes.Clostridia.Clostridiales._Tissierellaceae_	1.03127			-
Bacteria.Firmicutes.Clostridia.Clostridiales.Lachnospiraceae.Lachnospira.Lachnospira_pectinoschiza	0.785162			-
Bacteria.Proteobacteria.Alphaproteobacteria.Rhizobiales.Bradyrhizobiaceae	1.19079			-
Bacteria.Proteobacteria.Alphaproteobacteria.Rhizobiales.Methylobacteriaceae	0.272531			-
Bacteria.Firmicutes.Bacilli.Lactobacillales.Enterococcaceae.Enterococcus.Enterococcus_sulfureus	1.06726			-
Bacteria.Proteobacteria.Alphaproteobacteria.Rhodobacterales.Hyphomonadaceae	1.08013			-
Bacteria.Synergistetes.Synergistia.Synergistales.Dethiosulfovibrionaceae.Pyramidobacter.Pyramidobacter_piscolens	0.564902			-
Bacteria.Bacteroidetes.Bacteroidia.Bacteroidales.Rikenellaceae.Alistipes.Alistipes_putredinis	3.36549			-
Bacteria.Bacteroidetes.Bacteroidia.Bacteroidales.Prevotellaceae.Prevotella.Prevotella_copri	5.40795			-
Bacteria.Bacteroidetes.Bacteroidia.Bacteroidales.Rikenellaceae.Alistipes.Alistipes_indistinctus	2.11614			-
Bacteria.OP8.OP8_2	0.962843			-
Bacteria.Proteobacteria.Alphaproteobacteria.Rhizobiales.Phyllobacteriaceae.Mesorhizobium.Mesorhizobium_loti	0.0877814			-
Bacteria.Proteobacteria.Gammaproteobacteria.Pasteurellales.Pasteurellaceae.Haemophilus	2.79144			-
Bacteria.Actinobacteria.Actinobacteria.Actinomycetales.Micrococcaceae.Rothia.Rothia_aeria	0.983144			-
Bacteria.Actinobacteria.Coriobacteriia.Coriobacteriales.Coriobacteriaceae.Atopobium.Atopobium_vaginae	0.831579			-
Bacteria.Acidobacteria.Solibacteres.Solibacterales.Solibacteraceae	0.38881			-
Bacteria.Proteobacteria.Betaproteobacteria.Burkholderiales.Alcaligenaceae.Pigmentiphaga.Pigmentiphaga_daeguensis	0.301347			-
Bacteria.Firmicutes.Clostridia.Clostridiales.Lachnospiraceae.Clostridium.Clostridium_lavalense	1.43591			-
Bacteria.Firmicutes.Clostridia.Clostridiales.Lachnospiraceae.Lactonifactor.Lactonifactor_longoviformis	0.418072			-
Bacteria.Proteobacteria.Gammaproteobacteria.Xanthomonadales.Xanthomonadaceae	2.22076			-
Bacteria.Firmicutes.Clostridia.Clostridiales.Veillonellaceae.Schwartzia	0.381468			-
Bacteria.Firmicutes.Clostridia.Clostridiales.Lachnospiraceae.Clostridium.Clostridium_clostridioforme	3.77231			-
Bacteria.Tenericutes.Mollicutes.RF39	2.69214			-
Bacteria.Acidobacteria.Acidobacteria_6.iii1_15	0.714967			-
Bacteria.Firmicutes.Clostridia.Clostridiales.Ruminococcaceae.Faecalibacterium.Faecalibacterium_prausnitzii	5.02131			-
Bacteria.Tenericutes.RF3	2.21989			-
Bacteria.Firmicutes.Clostridia.Clostridiales.Lachnospiraceae.Clostridium	4.38293			-
Bacteria.Proteobacteria.Gammaproteobacteria.Pseudomonadales.Moraxellaceae.Acinetobacter.Acinetobacter_rhizosphaerae	0.807052			-
Bacteria.Actinobacteria.Actinobacteria.Bifidobacteriales.Bifidobacteriaceae.Bifidobacterium.Bifidobacterium_thermacidophilum	0.272531			-
Bacteria.Bacteroidetes.Bacteroidia.Bacteroidales.RF16	0.54438			-
Bacteria.Proteobacteria.Gammaproteobacteria.Xanthomonadales	2.24712			-
Bacteria.Proteobacteria.Gammaproteobacteria.Enterobacteriales.Enterobacteriaceae.Morganella	2.58843			-
Bacteria.Firmicutes.Clostridia.Clostridiales.Lachnospiraceae.Roseburia	4.6933			-
Bacteria.Proteobacteria.Alphaproteobacteria.Rhodobacterales.Rhodobacteraceae	0.381468			-
Bacteria.Firmicutes.Clostridia.Clostridiales.Clostridiaceae.Clostridium.Clostridium_perfringens	2.91009			-
Bacteria.Actinobacteria.Thermoleophilia.Solirubrobacterales	0.631849			-
Bacteria.Firmicutes.Clostridia.Clostridiales.Lachnospiraceae.Clostridium.Clostridium_citroniae	4.33012	CON	4.04817	0.00837346
Bacteria.Fusobacteria.Fusobacteriia.Fusobacteriales.Leptotrichiaceae	0.785162			-
Bacteria.Proteobacteria.Gammaproteobacteria.Pseudomonadales.Moraxellaceae.Psychrobacter.Psychrobacter_celer	1.628			-
Bacteria.AD3	0.669319			-
Bacteria.Proteobacteria.Alphaproteobacteria	3.13542			-
Bacteria.Proteobacteria.Alphaproteobacteria.Rhodospirillales.Rhodospirillaceae	0.970588			-
Bacteria.Proteobacteria.Alphaproteobacteria.Rhizobiales.Xanthobacteraceae	0.496495			-
Bacteria.Firmicutes.Erysipelotrichi.Erysipelotrichales.Erysipelotrichaceae._Eubacterium_._Eubacterium__biforme	3.35663			-
Bacteria.Actinobacteria.Actinobacteria.Bifidobacteriales.Bifidobacteriaceae.Bifidobacterium.Bifidobacterium_breve	3.73626			-
Bacteria.Chloroflexi.Anaerolineae.SBR1031	0.589545			-
Bacteria.Firmicutes.Clostridia.Clostridiales.Lachnospiraceae.Coprococcus.Coprococcus_catus	2.30809			-
Bacteria.Proteobacteria.Alphaproteobacteria.Caulobacterales.Caulobacteraceae.Caulobacter	1.88317			-
Bacteria.Firmicutes.Clostridia.Clostridiales.Lachnospiraceae.Ruminococcus.Ruminococcus_lactaris	3.00463			-
Bacteria.Proteobacteria.Betaproteobacteria	4.46105			-
Bacteria.Proteobacteria.Gammaproteobacteria.Pseudomonadales.Pseudomonadaceae.Pseudomonas.Pseudomonas_umsongensis	0.882916			-
Bacteria.Firmicutes.Clostridia.Clostridiales.Lachnospiraceae.Clostridium.Clostridium_fimetarium	1.06818			-
Bacteria.Firmicutes.Clostridia.Clostridiales.Lachnospiraceae.Moryella	0.506022			-
Bacteria.Proteobacteria.Alphaproteobacteria.Caulobacterales.Caulobacteraceae	1.94743			-
Bacteria.Actinobacteria.Actinobacteria.Bifidobacteriales.Bifidobacteriaceae.Bifidobacterium.Bifidobacterium_bifidum	2.18172			-
Bacteria.Proteobacteria.Gammaproteobacteria.Pseudomonadales.Moraxellaceae.Acinetobacter.Acinetobacter_johnsonii	3.46923	Case	3.22562	0.00108391
Bacteria.Firmicutes.Clostridia.Clostridiales.Veillonellaceae.Dialister	3.93273			-
Bacteria.Chloroflexi.Anaerolineae.SBR1031.A4b	0.589545			-
Bacteria.Actinobacteria.Thermoleophilia.Gaiellales.Gaiellaceae	0.786751			-
Bacteria.Gemmatimonadetes.Gemmatimonadetes.Gemmatimonadales.Ellin5301	0.485721			-
Bacteria.Firmicutes	5.55212			-
Bacteria.Proteobacteria.Betaproteobacteria.Rhodocyclales.Rhodocyclaceae.KD1_23	1.82937			-
Bacteria.Firmicutes.Clostridia.Clostridiales.Lachnospiraceae.Blautia	3.9952			-
Bacteria.Firmicutes.Bacilli.Bacillales.Bacillaceae.Halobacillus	0.244831			-
Bacteria.Bacteroidetes.Bacteroidia.Bacteroidales._Barnesiellaceae_.Barnesiella.Barnesiella_intestinihominis	2.72673			-
Bacteria.Chloroflexi.S085	0.483156			-
Bacteria.Firmicutes.Bacilli.Bacillales.Planococcaceae.Planococcus	1.47673			-
Bacteria.Firmicutes.Clostridia.Clostridiales.Peptostreptococcaceae.Clostridium.Clostridium_ruminantium	0.900395			-
Bacteria.Nitrospirae.Nitrospira.Nitrospirales.Nitrospiraceae	0.267215			-
Bacteria.Proteobacteria.Alphaproteobacteria.Caulobacterales	1.95634			-
Bacteria.Proteobacteria.Betaproteobacteria.Neisseriales.Neisseriaceae.Neisseria.Neisseria_oralis	0.807052			-
Bacteria.Firmicutes.Clostridia.Clostridiales.Lachnospiraceae	5.11793			-
Bacteria.Bacteroidetes.Bacteroidia.Bacteroidales.Porphyromonadaceae.Parabacteroides	3.78394			-
Bacteria.Firmicutes.Clostridia.Clostridiales.Veillonellaceae.Mitsuokella.Mitsuokella_multacida	1.68899			-
Bacteria.Firmicutes.Bacilli.Bacillales.Planococcaceae.Staphylococcus.Staphylococcus_saprophyticus	0.766229			-
Bacteria.Bacteroidetes.Bacteroidia.Bacteroidales.Bacteroidaceae.Bacteroides.Bacteroides_eggerthii	3.73486			-
Bacteria.Proteobacteria.Gammaproteobacteria.Xanthomonadales.Sinobacteraceae	1.0172			-
Bacteria.Firmicutes.Bacilli.Lactobacillales.Carnobacteriaceae	1.67685			-
Bacteria.Bacteroidetes._Saprospirae_._Saprospirales_.Saprospiraceae	0.858749			-
Bacteria.Proteobacteria.Alphaproteobacteria.Caulobacterales.Caulobacteraceae.Brevundimonas.Brevundimonas_diminuta	0.944564			-
Bacteria.Bacteroidetes.Flavobacteriia	1.22979			-
Bacteria.Proteobacteria.Alphaproteobacteria.Rhizobiales.Phyllobacteriaceae.Mesorhizobium	0.0877814			-
Bacteria.Bacteroidetes.Bacteroidia.Bacteroidales.Bacteroidaceae.Bacteroides.Bacteroides_uniformis	4.20116			-
Bacteria.Actinobacteria.Actinobacteria.Actinomycetales.Actinomycetaceae	2.38588			-
Bacteria.Firmicutes.Bacilli.Bacillales.Staphylococcaceae.Staphylococcus	1.43419			-
Bacteria.Actinobacteria.Actinobacteria.Bifidobacteriales	4.54839			-
Bacteria.TM7.TM7_3.CW040.F16	0.173058			-
Bacteria.Bacteroidetes._Saprospirae_	0.858749			-
Bacteria.Actinobacteria.Coriobacteriia	3.24732			-
Bacteria.Proteobacteria.Alphaproteobacteria.Caulobacterales.Caulobacteraceae.Nitrobacteria	0.765636			-
Bacteria.Proteobacteria.Deltaproteobacteria.Desulfovibrionales.Desulfovibrionaceae.Desulfovibrio	2.34226			-
Bacteria.Firmicutes.Clostridia.Clostridiales.Clostridiaceae.Clostridium.Clostridium_celatum	2.87121			-
Bacteria.Bacteroidetes.Sphingobacteriia.Sphingobacteriales.Sphingobacteriaceae.Pedobacter	0.641953			-
Bacteria.Firmicutes.Erysipelotrichi.Erysipelotrichales.Erysipelotrichaceae	4.30646	Case	3.93056	0.042982
Bacteria.Gemmatimonadetes	0.891343			-
Bacteria.Proteobacteria.Alphaproteobacteria.Rhodobacterales.Hyphomonadaceae.Oceanicaulis	1.08013			-
Bacteria.Proteobacteria.Gammaproteobacteria.Enterobacteriales.Enterobacteriaceae.Enterobacter	0.189345			-
Bacteria.Acidobacteria.iii1_8	0.379207			-
Bacteria.Proteobacteria.Deltaproteobacteria	2.78927			-
Bacteria.Bacteroidetes.Bacteroidia.Bacteroidales._Paraprevotellaceae_.Paraprevotella	2.88261			-
Bacteria.Firmicutes.Clostridia.Clostridiales.Peptostreptococcaceae.Peptostreptococcus	2.78839			-
Bacteria.Firmicutes.Clostridia.Clostridiales.Lachnospiraceae.Ruminococcus	3.00463			-
Bacteria.Bacteroidetes.Bacteroidia.Bacteroidales._Odoribacteraceae_	2.93389	CON	2.69631	0.0443224
Bacteria.Firmicutes.Bacilli.Lactobacillales.Streptococcaceae.Streptococcus.Streptococcus_anginosus	0.925537			-
Bacteria.Proteobacteria.Gammaproteobacteria.Pasteurellales.Pasteurellaceae.Aggregatibacter	2.78932			-
Bacteria.Firmicutes.Clostridia.Clostridiales.Clostridiaceae.Clostridium.Clostridium_neonatale	3.47943			-
Bacteria.Chloroflexi.Thermomicrobia.JG30_KF_CM45	0.932879			-
Bacteria.Bacteroidetes.Bacteroidia.Bacteroidales.Porphyromonadaceae.Parabacteroides.Parabacteroides_distasonis	3.69649			-
Bacteria.Firmicutes.Clostridia.Clostridiales.Clostridiaceae	3.79873			-
Bacteria.Firmicutes.Clostridia.Clostridiales.Veillonellaceae.Phascolarctobacterium	3.88585			-
Bacteria.Proteobacteria.Gammaproteobacteria.Enterobacteriales.Enterobacteriaceae.Pseudomonas	2.23059	Case	3.3811	0.0217523
Bacteria.Proteobacteria.Gammaproteobacteria.Enterobacteriales.Enterobacteriaceae.Shigella	5.17946	Case	4.87454	0.000190855
Bacteria.Firmicutes.Erysipelotrichi	4.30646	Case	3.93056	0.042982
Bacteria.Firmicutes.Clostridia.Clostridiales.Ruminococcaceae.Ruminococcus.Ruminococcus_albus	2.33516			-
Bacteria.Bacteroidetes.Bacteroidia.Bacteroidales._Paraprevotellaceae_._Prevotella_	0.38881			-
Bacteria.Proteobacteria.Betaproteobacteria.Burkholderiales.Alcaligenaceae.Pigmentiphaga	0.301347			-
Bacteria.Proteobacteria.Betaproteobacteria.Rhodocyclales	1.82937			-
Bacteria.Actinobacteria.Actinobacteria.Actinomycetales.Mycobacteriaceae	0.357771			-
Bacteria.Actinobacteria.Actinobacteria.Bifidobacteriales.Bifidobacteriaceae.Bifidobacterium.Bifidobacterium_adolescentis	3.64201			-
Bacteria.Firmicutes.Bacilli.Lactobacillales.Carnobacteriaceae.Isobaculum.Isobaculum_melis	0.54438			-
Bacteria.Proteobacteria.Gammaproteobacteria.Enterobacteriales.Enterobacteriaceae.Proteus	3.27735			-
Bacteria.Firmicutes.Bacilli.Lactobacillales.Aerococcaceae.Abiotrophia	1.0172			-
Bacteria.Proteobacteria.Gammaproteobacteria	5.42524	Case	5.07225	1.22077e-05
Bacteria.Chloroflexi.Ellin6529	0.428978			-
Bacteria.Actinobacteria.Actinobacteria	4.55132			-
Bacteria.Firmicutes.Bacilli.Lactobacillales.Lactobacillaceae.Lactobacillus.Lactobacillus_mucosae	0.790095			-
Bacteria.Firmicutes.Clostridia.Clostridiales.Lachnospiraceae.Pseudobutyrivibrio	1.5007			-
Bacteria.Firmicutes.Bacilli.Bacillales._Exiguobacteraceae_	0.765636			-
Bacteria.Proteobacteria.Gammaproteobacteria.Pasteurellales.Pasteurellaceae.Actinobacillus.Actinobacillus_delphinicola	1.88438			-
Bacteria.Firmicutes.Bacilli.Bacillales.Bacillaceae.Bacillus.Bacillus_thermoamylovorans	0.689841			-
Bacteria.Firmicutes.Bacilli.Lactobacillales.Enterococcaceae.Enterococcus	4.39737			-
Bacteria.Firmicutes.Clostridia.Clostridiales.Veillonellaceae.Veillonella.Veillonella_dispar	3.82823			-
Bacteria.Verrucomicrobia.Verrucomicrobiae.Verrucomicrobiales.Verrucomicrobiaceae.Akkermansia	2.54037			-
Bacteria.Spirochaetes.Spirochaetes.Spirochaetales.Spirochaetaceae.Treponema	1.72937			-
Bacteria.Firmicutes.Bacilli.Lactobacillales.Enterococcaceae.Vagococcus	1.54705			-
Bacteria.Proteobacteria.Gammaproteobacteria.Oceanospirillales.Oceanospirillaceae	1.17865	Case	3.83938	0.00989119
Bacteria.Firmicutes.Clostridia.Clostridiales.Veillonellaceae.Selenomonas.Selenomonas_lacticifex	0.906099			-
Bacteria.Synergistetes.Synergistia.Synergistales	0.990871			-
Bacteria.TM7	2.02046			-
Bacteria.Firmicutes.Clostridia.Clostridiales.Lachnospiraceae._Ruminococcus_	4.44781	Case	4.05196	0.00451889
Bacteria.Fusobacteria.Fusobacteriia	4.74485			-
Bacteria.Proteobacteria.Gammaproteobacteria.Xanthomonadales.Xanthomonadaceae.Thermomonas	0.457479			-
Bacteria.Bacteroidetes._Saprospirae_._Saprospirales_	0.858749			-
Bacteria.Proteobacteria.Gammaproteobacteria.Enterobacteriales.Enterobacteriaceae	5.40069	Case	5.0453	1.7061e-05
Bacteria.Firmicutes.Bacilli.Lactobacillales.Enterococcaceae.Enterococcus.Enterococcus_asini	2.52435			-
Bacteria.Proteobacteria.Deltaproteobacteria.Syntrophobacterales.Syntrophorhabdaceae	0.307066			-
Bacteria.Bacteroidetes.Bacteroidia.Bacteroidales._Barnesiellaceae_.Barnesiella	2.72673			-
Bacteria.Firmicutes.Bacilli.Lactobacillales.Streptococcaceae.Lactococcus.Lactococcus_garvieae	2.68665			-
Bacteria.Firmicutes.Clostridia.Clostridiales.Ruminococcaceae.Ruminococcus.Ruminococcus_bromii	2.83609			-
Bacteria.Firmicutes.Clostridia.Clostridiales.Lachnospiraceae.Pseudobutyrivibrio.Pseudobutyrivibrio_xylanivorans	1.5007			-
Bacteria.Actinobacteria.Coriobacteriia.Coriobacteriales.Coriobacteriaceae	3.24732			-
Bacteria.Firmicutes.Erysipelotrichi.Erysipelotrichales.Erysipelotrichaceae.Coprobacillus	1.43391	CON	4.43385	0.0461009
Bacteria.Firmicutes.Bacilli.Turicibacterales.Turicibacteraceae.Turicibacter	2.16023			-
Bacteria.Proteobacteria.Gammaproteobacteria.Vibrionales.Pseudoalteromonadaceae	0.381468			-
Bacteria.Proteobacteria.Gammaproteobacteria.Pasteurellales.Pasteurellaceae.Actinobacillus.Actinobacillus_porcinus	1.19925			-
Bacteria.Firmicutes.Bacilli.Lactobacillales.Leuconostocaceae.Weissella.Weissella_hellenica	0.980116			-
Bacteria.Proteobacteria.Alphaproteobacteria.Rhodospirillales.Rhodospirillaceae.Azospirillum	0.970588			-
Bacteria.Firmicutes.Bacilli.Turicibacterales	2.16023			-
Bacteria.Bacteroidetes.Bacteroidia.Bacteroidales.p_2534_18B5	0.828144			-
Bacteria.Tenericutes.Mollicutes	2.69956			-
Bacteria.Actinobacteria.Coriobacteriia.Coriobacteriales.Coriobacteriaceae.Paraeggerthella	1.30396			-
Bacteria.Firmicutes.Erysipelotrichi.Erysipelotrichales.Erysipelotrichaceae.Clostridium.Clostridium_spiroforme	2.04551			-
Bacteria.Proteobacteria.Gammaproteobacteria.Pseudomonadales.Moraxellaceae	3.65377	Case	3.39532	0.00167365
Bacteria.Firmicutes.Clostridia.Clostridiales.Lachnospiraceae.Dorea.Dorea_formicigenerans	3.05605			-
Bacteria.Proteobacteria.Alphaproteobacteria.Sphingomonadales.Sphingomonadaceae	1.09372			-
Bacteria.Bacteroidetes.Bacteroidia.Bacteroidales.Prevotellaceae.Prevotella.Prevotella_stercorea	3.19513			-
Bacteria.Cyanobacteria.Chloroplast.Streptophyta	1.44951			-
Bacteria.Proteobacteria.Betaproteobacteria.Burkholderiales.Burkholderiaceae	1.27874			-
Bacteria.Firmicutes.Clostridia.Clostridiales.Ruminococcaceae.Faecalibacterium	5.02303			-
Bacteria.Firmicutes.Clostridia.Clostridiales.Clostridiaceae.Clostridium.Clostridium_disporicum	1.0282			-
Bacteria.TM7.TM7_3.CW040	0.381083			-
Bacteria.Firmicutes.Clostridia.Clostridiales.Lachnospiraceae.Coprococcus.Coprococcus_eutactus	3.70074			-
Bacteria.Actinobacteria.Actinobacteria.Actinomycetales.Corynebacteriaceae.Corynebacterium	2.21036	Case	3.59694	0.0235768
Bacteria.Bacteroidetes.Bacteroidia.Bacteroidales.Porphyromonadaceae.Parabacteroides.Parabacteroides_gordonii	1.84954	Case	3.74005	0.0178677
Bacteria.Proteobacteria.Gammaproteobacteria.Enterobacteriales.Enterobacteriaceae.Erwinia	0.872029			-
Bacteria.Firmicutes.Clostridia.Clostridiales.Lachnospiraceae.Blautia.Blautia_producta	2.47664			-
Bacteria.Firmicutes.Clostridia.Clostridiales.Veillonellaceae.Veillonella.Veillonella_parvula	3.09261			-
Bacteria.Proteobacteria.Gammaproteobacteria.Enterobacteriales.Enterobacteriaceae.Shigella.Shigella_dysenteriae	0.54438			-
Bacteria.Bacteroidetes.Flavobacteriia.Flavobacteriales.Flavobacteriaceae.Flavobacterium	1.05813			-
Bacteria.Actinobacteria.Coriobacteriia.Coriobacteriales.Coriobacteriaceae.Eggerthella.Eggerthella_lenta	1.43311			-
Bacteria.Bacteroidetes.Bacteroidia.Bacteroidales	5.77782	Treat	5.1883	0.00128359
Bacteria.Firmicutes.Clostridia.Clostridiales.Ruminococcaceae.Gemmiger	4.34786			-
Bacteria.Firmicutes.Clostridia.Clostridiales.Clostridiaceae.Clostridium.Clostridium_butyricum	2.99282			-
Bacteria.Firmicutes.Clostridia.Clostridiales.Ruminococcaceae.Clostridium	0.477439			-
Bacteria.Firmicutes.Bacilli.Lactobacillales.Lactobacillaceae.Lactobacillus.Lactobacillus_vaginalis	1.71732			-
Bacteria.Firmicutes.Bacilli.Bacillales.Thermoactinomycetaceae.Thermoactinomyces	1.67238			-
Bacteria.Firmicutes.Clostridia.Clostridiales.Lachnospiraceae.Clostridium.Clostridium_colinum	3.74325			-
Bacteria.Firmicutes.Bacilli.Lactobacillales.Aerococcaceae.Abiotrophia.Abiotrophia_defectiva	0.171949			-
Bacteria.Proteobacteria.Gammaproteobacteria.Cardiobacteriales	0.983144			-
Bacteria.Proteobacteria.Gammaproteobacteria.Pasteurellales.Pasteurellaceae	3.04517			-
Bacteria.Firmicutes.Clostridia.Clostridiales.Lachnospiraceae.Clostridium.Clostridium_bolteae	1.38126			-
Bacteria.Firmicutes.Clostridia.Clostridiales.Lachnospiraceae.Dorea.Dorea_longicatena	3.7034			-
Bacteria.Firmicutes.Clostridia.Clostridiales.Peptococcaceae	1.274			-
Bacteria.TM7.TM7_3.I025	0.856829			-
Bacteria.Firmicutes.Bacilli.Lactobacillales.Enterococcaceae	4.40357			-
Bacteria.Actinobacteria.Actinobacteria.Micrococcales	1.06633	CON	4.33481	0.0461009
Bacteria.Firmicutes.Bacilli.Lactobacillales.Aerococcaceae.Granulicatella	0.365436			-
Bacteria.Actinobacteria.Actinobacteria.Actinomycetales.Micrococcaceae	2.50672			-
Bacteria.Bacteroidetes.Bacteroidia.Bacteroidales._Paraprevotellaceae_	3.02805			-
Bacteria.Firmicutes.Clostridia.Clostridiales.Ruminococcaceae.Gemmiger.Gemmiger_formicilis	4.34786			-
Bacteria.Actinobacteria.Coriobacteriia.Coriobacteriales.Coriobacteriaceae.Collinsella	3.23227			-
Bacteria.Proteobacteria.Gammaproteobacteria.Xanthomonadales.Xanthomonadaceae.Stenotrophomonas.Stenotrophomonas_acidaminiphila	1.17064			-
Bacteria.Actinobacteria.Actinobacteria.Actinomycetales.Microbacteriaceae.Yonghaparkia	0.74906			-
Bacteria.Proteobacteria.Epsilonproteobacteria.Campylobacterales	1.77093			-
Bacteria.Actinobacteria.Coriobacteriia.Coriobacteriales.Coriobacteriaceae.Coriobacterium	0.682498			-
Bacteria.Proteobacteria.Gammaproteobacteria.Oceanospirillales.Halomonadaceae.Halomonas	2.84847	Case	2.67787	0.00381102
Bacteria.Acidobacteria.Acidobacteria_6	0.714967			-
Bacteria.Firmicutes.Erysipelotrichi.Erysipelotrichales.Erysipelotrichaceae.Holdemania	1.11704			-
Bacteria.Firmicutes.Clostridia.Clostridiales.Lachnospiraceae._Ruminococcus_._Ruminococcus__torques	3.30557			-
Bacteria.Firmicutes.Bacilli.Lactobacillales.Lactobacillaceae.Pediococcus	3.45488			-
Bacteria.Firmicutes.Clostridia.Clostridiales.Lachnospiraceae.Clostridium.Clostridium_symbiosum	2.21431			-
Bacteria.Firmicutes.Bacilli	4.49798			-
Bacteria.Firmicutes.Erysipelotrichi.Erysipelotrichales.Erysipelotrichaceae.cc_115	0.660224			-
Bacteria.Firmicutes.Clostridia.Clostridiales.Veillonellaceae.Anaerosinus	0.474089			-
Bacteria.Acidobacteria.Solibacteres.Solibacterales	0.730007			-
Bacteria.Firmicutes.Bacilli.Lactobacillales.Lactobacillaceae.Pediococcus.Pediococcus_acidilactici	3.43667			-
Bacteria.Firmicutes.Bacilli.Lactobacillales.Aerococcaceae	1.16358			-
Bacteria.Proteobacteria.Alphaproteobacteria.Rhizobiales.Rhizobiaceae.Rhizobium	0.508932			-
Bacteria.Proteobacteria.Alphaproteobacteria.Sphingomonadales	1.09372			-
Bacteria.Firmicutes.Clostridia.Clostridiales.Lachnospiraceae._Ruminococcus_._Ruminococcus__gnavus	4.37859	Case	4.04056	0.00220703
Bacteria.Firmicutes.Clostridia.Clostridiales.Veillonellaceae.Veillonella	3.91331			-
Bacteria.Bacteroidetes.Bacteroidia.Bacteroidales.Prevotellaceae	5.41391			-
Bacteria.Tenericutes	2.82386			-
Bacteria.Proteobacteria.Deltaproteobacteria.Myxococcales	0.743662			-
Bacteria.Proteobacteria.Betaproteobacteria.Burkholderiales.Burkholderiaceae.Burkholderia	1.27874			-
Bacteria.AD3.ABS_6	0.669319			-
Bacteria.Proteobacteria.Gammaproteobacteria.Cardiobacteriales.Cardiobacteriaceae	0.983144			-
Bacteria.Actinobacteria.Thermoleophilia	1.0172			-
Bacteria.Proteobacteria.Betaproteobacteria.Burkholderiales.Comamonadaceae.Comamonas	1.5323			-
Bacteria.Bacteroidetes.Bacteroidia.Bacteroidales.Rikenellaceae.Alistipes.Alistipes_onderdonkii	3.65152			-
Bacteria.Proteobacteria.Gammaproteobacteria.Oceanospirillales	2.85766	Case	2.68228	0.00353065
Bacteria.Firmicutes.Clostridia.Clostridiales	5.54534			-
Bacteria.Verrucomicrobia.Verrucomicrobiae.Verrucomicrobiales.Verrucomicrobiaceae	2.54037			-
Bacteria.Firmicutes.Bacilli.Gemellales	1.50165			-
Bacteria.Firmicutes.Bacilli.Lactobacillales.Enterococcaceae.Melissococcus	1.24867			-
Bacteria.Actinobacteria.Coriobacteriia.Coriobacteriales	3.24732			-
Bacteria.Actinobacteria.Coriobacteriia.Coriobacteriales.Coriobacteriaceae.Collinsella.Collinsella_aerofaciens	3.22211			-
Bacteria.Firmicutes.Bacilli.Lactobacillales.Streptococcaceae.Lactococcus	3.04655			-
Bacteria.Firmicutes.Clostridia.Clostridiales.Veillonellaceae.Megamonas	4.87433	Treat	4.56731	0.00902378
Bacteria.Gemmatimonadetes.Gemmatimonadetes.Gemmatimonadales	0.485721			-
Bacteria.Proteobacteria.Betaproteobacteria.Burkholderiales.Burkholderiaceae.Lautropia	0.666466			-
Bacteria.Firmicutes.Clostridia.Clostridiales.Lachnospiraceae.Roseburia.Roseburia_inulinivorans	2.49804			-
Bacteria.Firmicutes.Bacilli.Lactobacillales.Lactobacillaceae.Lactobacillus.Lactobacillus_paraplantarum	0.378056			-
Bacteria.Lentisphaerae._Lentisphaeria_.Victivallales.Victivallaceae	2.45036			-
Bacteria.Actinobacteria.Coriobacteriia.Coriobacteriales.Coriobacteriaceae.Slackia	1.14369			-
Bacteria.Fusobacteria.Fusobacteriia.Fusobacteriales.Leptotrichiaceae.Leptotrichia	0.204992			-
Bacteria.Proteobacteria.Alphaproteobacteria.Sphingomonadales.Sphingomonadaceae.Sphingobium.Sphingobium_yanoikuyae	0.714967			-
Bacteria.Firmicutes.Clostridia.Clostridiales.Ruminococcaceae.Ruminococcus.Ruminococcus_callidus	2.99256	CON	2.74893	0.0479925
Bacteria.Actinobacteria.Actinobacteria.Bifidobacteriales.Bifidobacteriaceae.Gardnerella	1.3701			-
Bacteria.Firmicutes.Bacilli.Lactobacillales.Aerococcaceae.Granulicatella.Granulicatella_balaenopterae	0.365436			-
Bacteria.Actinobacteria.Actinobacteria.Actinomycetales.Nocardiaceae	1.4302			-
Bacteria.Proteobacteria.Gammaproteobacteria.Pseudomonadales.Moraxellaceae.Alkanindiges	1.83266			-
Bacteria.Proteobacteria.Betaproteobacteria.Burkholderiales.Comamonadaceae.Rubrivivax	0.833693			-
Bacteria.Proteobacteria.Gammaproteobacteria.Enterobacteriales.Enterobacteriaceae.Xenorhabdus	1.97111	Case	3.30868	0.00252187
Bacteria.Actinobacteria.Actinobacteria.Actinomycetales.Streptomycetaceae.Streptomyces	1.63933	CON	3.1783	0.0400917
Bacteria.Proteobacteria.Alphaproteobacteria.Caulobacterales.Caulobacteraceae.Brevundimonas	1.04947			-
Bacteria.Proteobacteria.Gammaproteobacteria.Enterobacteriales.Enterobacteriaceae.Proteus.Proteus_myxofaciens	1.35714			-
Bacteria.Fusobacteria.Fusobacteriia.Fusobacteriales.Leptotrichiaceae.Sneathia	0.785162			-
Bacteria.Proteobacteria.Alphaproteobacteria.Rhodospirillales	1.16518			-
Bacteria.Fusobacteria.Fusobacteriia.Fusobacteriales	4.74485			-
Bacteria.Bacteroidetes.Flavobacteriia.Flavobacteriales._Weeksellaceae_.Chryseobacterium	0.743662			-
Bacteria.Lentisphaerae	2.45036			-
Bacteria.Firmicutes.Bacilli.Bacillales	2.49019			-
Bacteria.Proteobacteria.Gammaproteobacteria.Pseudomonadales.Moraxellaceae.Enhydrobacter	1.11907			-
Bacteria.Proteobacteria.Betaproteobacteria.Burkholderiales.Oxalobacteraceae.Duganella	1.52699			-
Bacteria.Firmicutes.Bacilli.Lactobacillales.Leuconostocaceae.Weissella	2.8509			-
Bacteria.Tenericutes.RF3.ML615J_28	2.21989			-
Bacteria.Bacteroidetes.Flavobacteriia.Flavobacteriales	1.22979			-
Bacteria.Firmicutes.Clostridia.Clostridiales._Tissierellaceae_.Parvimonas	0.74906			-
Bacteria.Firmicutes.Clostridia.Clostridiales.Ruminococcaceae.Ruminococcus.Ruminococcus_flavefaciens	1.08317			-
Bacteria.Lentisphaerae._Lentisphaeria_	2.45036			-
Bacteria.Spirochaetes.Spirochaetes.Spirochaetales.Spirochaetaceae	1.72937			-
Bacteria.Bacteroidetes.Bacteroidia.Bacteroidales._Barnesiellaceae_	3.36844			-
Bacteria.Lentisphaerae._Lentisphaeria_.Victivallales.Victivallaceae.Victivallis.Victivallis_vadensis	0.685225			-
Bacteria.Actinobacteria.Actinobacteria.Actinomycetales.Nocardiaceae.Rhodococcus.Rhodococcus_globerulus	0.204992			-
Bacteria.Proteobacteria.Alphaproteobacteria.BD7_3	0.0877814			-
Bacteria.Actinobacteria.Coriobacteriia.Coriobacteriales.Coriobacteriaceae.Eggerthella	1.57191			-
Bacteria.Proteobacteria.Deltaproteobacteria.Desulfovibrionales.Desulfovibrionaceae.Bilophila	2.6891			-
Bacteria.Proteobacteria.Betaproteobacteria.Rhodocyclales.Rhodocyclaceae	1.82937			-
Bacteria.Lentisphaerae._Lentisphaeria_.Victivallales.Victivallaceae.Victivallis	0.685225			-
Bacteria.Firmicutes.Erysipelotrichi.Erysipelotrichales.Erysipelotrichaceae.Coprobacillus.Coprobacillus_cateniformis	1.14688			-
Bacteria.Proteobacteria.Betaproteobacteria.Burkholderiales.Oxalobacteraceae.Cupriavidus	1.90731	Case	3.3665	0.00396902
Bacteria.Actinobacteria.Thermoleophilia.Gaiellales	0.786751			-
Bacteria.Firmicutes.Bacilli.Bacillales.Planococcaceae.Staphylococcus	0.766229			-
Bacteria.Verrucomicrobia.Verrucomicrobiae	2.54037			-
Bacteria.Firmicutes.Clostridia.Clostridiales.Ruminococcaceae.Subdoligranulum.Subdoligranulum_variabile	2.60253			-
Bacteria.Actinobacteria.Coriobacteriia.Coriobacteriales.Coriobacteriaceae.Paraeggerthella.Paraeggerthella_hongkongensis	1.30396			-
Bacteria.Bacteroidetes.Bacteroidia.Bacteroidales._Odoribacteraceae_.Butyricimonas	2.88747			-
Bacteria.Bacteroidetes.Bacteroidia	5.77782	Treat	5.1883	0.00128359
Bacteria.Firmicutes.Bacilli.Bacillales.Thermoactinomycetaceae	1.67238			-
Bacteria.Proteobacteria.Gammaproteobacteria.Cardiobacteriales.Cardiobacteriaceae.Cardiobacterium.Cardiobacterium_valvarum	0.983144			-
Bacteria.Bacteroidetes.Bacteroidia.Bacteroidales.Prevotellaceae.Prevotella	5.41387			-
Bacteria.Proteobacteria.Gammaproteobacteria.Cardiobacteriales.Cardiobacteriaceae.Suttonella	0.368288			-
Bacteria.Proteobacteria.Betaproteobacteria.Neisseriales	1.863			-
Bacteria.Firmicutes.Clostridia.Clostridiales.Ruminococcaceae.Subdoligranulum	2.60253			-
Bacteria.Firmicutes.Clostridia.Clostridiales.Dehalobacteriaceae.Dehalobacterium	1.68523			-
Bacteria.Fusobacteria.Fusobacteriia.Fusobacteriales.Fusobacteriaceae.Fusobacterium	4.44589			-
Bacteria.Proteobacteria.Betaproteobacteria.Burkholderiales.Alcaligenaceae	4.44338			-
Bacteria.Bacteroidetes.Bacteroidia.Bacteroidales.Porphyromonadaceae.Macellibacteroides	1.34788			-
Bacteria.Firmicutes.Clostridia.Clostridiales.Ruminococcaceae.Ruminococcus	3.76091			-
Bacteria.Firmicutes.Bacilli.Lactobacillales	4.49318			-
Bacteria.Actinobacteria.Actinobacteria.Actinomycetales.Micrococcaceae.Rothia.Rothia_mucilaginosa	2.44679			-
Bacteria.Chloroflexi.Chloroflexi._Roseiflexales_._Kouleothrixaceae_	0.368288			-
Bacteria.Proteobacteria.Betaproteobacteria.Burkholderiales.Comamonadaceae.Caldimonas.Caldimonas_taiwanensis	0.64915			-
Bacteria.Firmicutes.Clostridia.Clostridiales.Lachnospiraceae.Lactonifactor	0.418072			-
Bacteria.Cyanobacteria.Chloroplast	1.44951			-
Bacteria.Firmicutes.Bacilli.Bacillales.Planococcaceae.Kurthia.Kurthia_gibsonii	1.25218			-
Bacteria.Bacteroidetes.Bacteroidia.Bacteroidales.Porphyromonadaceae.Dysgonomonas	1.76604			-
Bacteria.Actinobacteria.Actinobacteria.Actinomycetales.Brevibacteriaceae	1.38858			-
Bacteria.Gemmatimonadetes.Gemm_5	0.0877814			-
Bacteria.Firmicutes.Bacilli.Lactobacillales.Lactobacillaceae	3.56966			-
Bacteria.Gemmatimonadetes.Gemm_1	0.54438			-
Bacteria.Firmicutes.Bacilli.Lactobacillales.Leuconostocaceae.Leuconostoc.Leuconostoc_mesenteroides	0.38881			-
Bacteria.Proteobacteria.Gammaproteobacteria.Pseudomonadales.Moraxellaceae.Acinetobacter.Acinetobacter_lwoffii	1.2225			-
Bacteria.Firmicutes.Clostridia.Clostridiales._Tissierellaceae_.Finegoldia	0.679085			-
Bacteria.Firmicutes.Clostridia.SHA_98	1.03741			-
Bacteria.Bacteroidetes.Bacteroidia.Bacteroidales.Rikenellaceae.Alistipes	3.67286			-
Bacteria.Firmicutes.Bacilli.Lactobacillales.Carnobacteriaceae.Isobaculum	0.54438			-
Bacteria.Firmicutes.Clostridia.Clostridiales.Veillonellaceae	4.98933			-
Bacteria.Proteobacteria.Betaproteobacteria.Burkholderiales.Oxalobacteraceae.Herbaspirillum	0.921812			-
Bacteria.Chloroflexi.Ktedonobacteria.JG30_KF_AS9	0.318877			-
Bacteria.Firmicutes.Clostridia.Clostridiales.Lachnospiraceae.Clostridium.Clostridium_hathewayi	1.96271			-
Bacteria.Firmicutes.Bacilli.Lactobacillales.Streptococcaceae.Streptococcus.Streptococcus_alactolyticus	2.30141			-
Bacteria.Actinobacteria.Coriobacteriia.Coriobacteriales.Coriobacteriaceae.Atopobium	1.61361			-
Bacteria.Fusobacteria	4.74485			-
Bacteria.Firmicutes.Clostridia	5.54536			-
Bacteria.Proteobacteria.Alphaproteobacteria.Ellin329	0.428978			-
Bacteria.Firmicutes.Clostridia.Clostridiales.Lachnospiraceae.Coprococcus	4.03755			-
Bacteria.Bacteroidetes._Saprospirae_._Saprospirales_.Saprospiraceae.Aquirestis.Aquirestis_calciphila	0.379207			-
Bacteria.Firmicutes.Erysipelotrichi.Erysipelotrichales.Erysipelotrichaceae.Clostridium	2.54337			-
Bacteria.Bacteroidetes.Bacteroidia.Bacteroidales.Bacteroidaceae.Bacteroides.Bacteroides_coprophilus	2.87271			-
Bacteria.Proteobacteria.Gammaproteobacteria.Aeromonadales.Succinivibrionaceae	0.852049			-
Bacteria.Proteobacteria.Gammaproteobacteria.Enterobacteriales.Enterobacteriaceae.Cronobacter	2.58611			-
Bacteria.Synergistetes	0.990871			-
Bacteria.Proteobacteria.Gammaproteobacteria.Xanthomonadales.Xanthomonadaceae.Dyella.Dyella_ginsengisoli	0.392154			-
Bacteria.Nitrospirae	0.267215			-
Bacteria.Firmicutes.Clostridia.Clostridiales.Clostridiaceae.Clostridium	3.75297			-
Bacteria.Actinobacteria.Coriobacteriia.Coriobacteriales.Coriobacteriaceae.Olsenella	0.458889			-
Bacteria.Proteobacteria.Alphaproteobacteria.Rhizobiales.Phyllobacteriaceae.Chelativorans	1.66395			-
Bacteria.Proteobacteria.Deltaproteobacteria.NB1_j	0.421363			-
Bacteria.Proteobacteria.Epsilonproteobacteria.Campylobacterales.Campylobacteraceae.Campylobacter	1.70039			-
Bacteria.Acidobacteria	1.16743			-
Bacteria.Chloroflexi.Chloroflexi._Roseiflexales_	0.368288			-
Bacteria.Proteobacteria.Alphaproteobacteria.Caulobacterales.Caulobacteraceae.Brevundimonas.Brevundimonas_intermedia	0.381083			-
Bacteria.Actinobacteria.Actinobacteria.Actinomycetales.Microbacteriaceae.Labedella	0.204992			-
Bacteria.Actinobacteria.Actinobacteria.Actinomycetales.Micrococcaceae.Rothia	2.48375			-
Bacteria.Actinobacteria.Actinobacteria.Actinomycetales.Nocardioidaceae	0.736788			-
Bacteria.Synergistetes.Synergistia.Synergistales.TTA_B6.E6	0.786751			-
Bacteria.Proteobacteria.Betaproteobacteria.SC_I_84	0.263873			-
Bacteria.Firmicutes.Bacilli.Lactobacillales.Leuconostocaceae.Leuconostoc	0.38881			-
Bacteria.Firmicutes.Clostridia.Clostridiales.Lachnospiraceae.Clostridium.Clostridium_aldenense	2.76507			-
Bacteria.Proteobacteria.Gammaproteobacteria.Thiotrichales.Piscirickettsiaceae	0.421363			-
Bacteria.Verrucomicrobia.Verrucomicrobiae.Verrucomicrobiales	2.54037			-
Bacteria.Firmicutes.Clostridia.Clostridiales.Lachnospiraceae.Oribacterium	0.635192			-
Bacteria.Firmicutes.Bacilli.Gemellales.Gemellaceae	1.50165			-
Bacteria.Proteobacteria.Gammaproteobacteria.Aeromonadales.Aeromonadaceae	2.45306	Case	2.90409	0.00187706
Bacteria.Bacteroidetes.Sphingobacteriia.Sphingobacteriales	0.641953			-
Bacteria.Bacteroidetes.Bacteroidia.Bacteroidales.Bacteroidaceae.Bacteroides.Bacteroides_acidifaciens	2.73936			-
Bacteria.Firmicutes.Bacilli.Bacillales._Exiguobacteraceae_.Exiguobacterium	0.765636			-
Bacteria.Firmicutes.Bacilli.Bacillales.Sporolactobacillaceae	1.11907			-
Bacteria.Proteobacteria.Betaproteobacteria.Burkholderiales	4.45871			-
Bacteria.Proteobacteria.Gammaproteobacteria.Pseudomonadales.Moraxellaceae.Acinetobacter.Acinetobacter_schindleri	2.97853	Case	2.81389	0.000983055
Bacteria.Firmicutes.Bacilli.Lactobacillales.Lactobacillaceae.Lactobacillus.Lactobacillus_helveticus	0.639879			-
Bacteria.Proteobacteria.Betaproteobacteria.Burkholderiales.Alcaligenaceae.Sutterella	4.44321			-
Bacteria.Proteobacteria.Alphaproteobacteria.Sphingomonadales.Sphingomonadaceae.Sphingobium	1.09372			-
Bacteria.Firmicutes.Clostridia.Clostridiales.Ruminococcaceae.Anaerotruncus	1.69441			-
Bacteria.Bacteroidetes.Flavobacteriia.Flavobacteriales.Flavobacteriaceae.Flavobacterium.Flavobacterium_frigidarium	0.465862			-
Bacteria.Firmicutes.Erysipelotrichi.Erysipelotrichales.Erysipelotrichaceae._Eubacterium_	4.28749			-
Bacteria.Proteobacteria.Betaproteobacteria.Burkholderiales.Comamonadaceae.Caldimonas	0.64915			-
Bacteria.Proteobacteria.Gammaproteobacteria.Enterobacteriales.Enterobacteriaceae.Erwinia.Erwinia_chrysanthemi	0.872029			-
Bacteria.Gemmatimonadetes.Gemmatimonadetes	0.485721			-
Bacteria.Proteobacteria.Betaproteobacteria.Neisseriales.Neisseriaceae.Snodgrassella	0.942049			-
Bacteria.Chloroflexi.Ktedonobacteria	0.318877			-
Bacteria.Proteobacteria.Betaproteobacteria.Burkholderiales.Comamonadaceae.Comamonas.Comamonas_terrigena	1.45505			-
Bacteria.Bacteroidetes.Bacteroidia.Bacteroidales.Bacteroidaceae.Bacteroides.Bacteroides_plebeius	5.00672	Treat	4.72765	0.00205727
Bacteria.Actinobacteria.Actinobacteria.Actinomycetales.Streptomycetaceae	1.63933			-
Bacteria.Firmicutes.Bacilli.Bacillales.Staphylococcaceae	1.97616			-
Bacteria.Firmicutes.Clostridia.Clostridiales.Lachnospiraceae.Epulopiscium	0.882073			-
Bacteria.Bacteroidetes.Bacteroidia.Bacteroidales.Rikenellaceae.Alistipes.Alistipes_finegoldii	1.99775			-
Bacteria.Actinobacteria.Actinobacteria.Actinomycetales.Beutenbergiaceae	1.33465	CON	3.82281	0.00878498
Bacteria.Bacteroidetes.Sphingobacteriia	0.641953			-
Bacteria.Firmicutes.Clostridia.Clostridiales.Veillonellaceae.Megasphaera	3.15371			-
Bacteria.Chloroflexi.Anaerolineae.GCA004	0.484133			-
Bacteria.Bacteroidetes.Bacteroidia.Bacteroidales.Porphyromonadaceae	3.78605			-
Bacteria.Actinobacteria	4.57237			-
Bacteria.Actinobacteria.Actinobacteria.Actinomycetales.Mycobacteriaceae.Mycobacterium	0.357771			-
Bacteria.Acidobacteria.iii1_8.DS_18	0.379207			-
Bacteria.Actinobacteria.Actinobacteria.Actinomycetales.Micrococcaceae.Nesterenkonia	0.956249			-
Bacteria	6			-
Bacteria.Actinobacteria.Actinobacteria.Actinomycetales.Corynebacteriaceae.Corynebacterium.Corynebacterium_variabile	1.92673			-
