# Supplementary material for: Traditional Chinese medicine improves myasthenia gravis by regulating the symbiotic homeostasis of the intestinal microbiota and host
Source: Front Microbiol. 2023 Jan 6;13:1082565. doi: 10.3389/fmicb.2022.1082565 (PMC9852828; doi:10.3389/fmicb.2022.1082565)
Supplement: Supplementary file 5 [file Table_5.xlsx]

## Sheet: Sheet1
Fig. 5a				Fig. 5b
Level1	Level2	Abundance			CON1	CON2	CON3	CON4	CON5	CON6	CON7	CON8	CON9	CON10	Case01	Case02	Case03	Case04	Case05	Case06	Case07	Case08	Case09	Case10	Case11	Case12	Case13	Case14	Case15	Case16	Case17	Treat01	Treat02	Treat03	Treat04	Treat05	Treat06	Treat07	Treat08	Treat09	Treat10	Treat11	Treat12	Treat13
Cellular Processes	Cell growth and death	551.24		CON1	0	0.234477	0.210663	0.227802	0.222163	0.200841	0.274514	0.309211	0.229066	0.214031	0.239578	0.431992	0.402922	0.270769	0.280725	0.189098	0.238006	0.217339	0.256279	0.299435	0.232684	0.363389	0.397884	0.48545	0.259266	0.24764	0.26858	0.306677	0.238954	0.248658	0.218541	0.269829	0.231638	0.247768	0.344621	0.208755	0.210209	0.194086	0.230295	0.264393
Cellular Processes	Cell motility	408.65		CON2	0.234477	0	0.189026	0.203365	0.180425	0.175803	0.277819	0.305107	0.214576	0.206205	0.234441	0.418403	0.386048	0.238556	0.242363	0.183916	0.208922	0.180479	0.213605	0.254075	0.187789	0.312067	0.472999	0.488906	0.245177	0.233125	0.2531	0.294754	0.219814	0.253317	0.198192	0.261123	0.196953	0.208802	0.339814	0.176272	0.171947	0.156081	0.204071	0.222652
Cellular Processes	Cellular community - eukaryotes	0		CON3	0.210663	0.189026	0	0.165862	0.0618637	0.136603	0.26816	0.279534	0.120115	0.127861	0.206567	0.439462	0.405029	0.245914	0.23709	0.128747	0.198375	0.139609	0.225966	0.279944	0.177979	0.400326	0.503726	0.533411	0.264908	0.247579	0.212578	0.273543	0.124955	0.159382	0.162082	0.213665	0.0707144	0.233425	0.320382	0.0890555	0.0595844	0.105282	0.14348	0.176882
Cellular Processes	Cellular community - prokaryotes	62.4		CON4	0.227802	0.203365	0.165862	0	0.132805	0.149078	0.242191	0.188294	0.143239	0.179294	0.235113	0.402104	0.36541	0.227364	0.216066	0.171794	0.194181	0.134491	0.252775	0.29489	0.171916	0.392469	0.472397	0.501007	0.223728	0.208358	0.277725	0.196325	0.167118	0.20343	0.216379	0.124129	0.12993	0.247469	0.227112	0.190842	0.174218	0.132851	0.138376	0.1911
Cellular Processes	Transport and catabolism	93.47		CON5	0.222163	0.180425	0.0618637	0.132805	0	0.141107	0.261082	0.247544	0.131529	0.154423	0.219697	0.427271	0.392075	0.235685	0.220803	0.146394	0.203757	0.132061	0.23369	0.280456	0.172596	0.397192	0.496244	0.524724	0.252051	0.235631	0.233547	0.242033	0.139309	0.180583	0.166029	0.188476	0.0396929	0.228095	0.288548	0.104069	0.0740193	0.108878	0.129626	0.161741
Environmental Information Processing	Membrane transport	753.21		CON6	0.200841	0.175803	0.136603	0.149078	0.141107	0	0.208215	0.266669	0.15952	0.132951	0.163853	0.404492	0.371603	0.221854	0.237852	0.0969708	0.145984	0.11106	0.153333	0.207501	0.127721	0.332266	0.463057	0.489095	0.193123	0.175759	0.196645	0.254922	0.151419	0.20844	0.143986	0.220413	0.160023	0.168429	0.304504	0.132008	0.130287	0.0786622	0.161518	0.228987
Environmental Information Processing	Signal transduction	128.44		CON7	0.274514	0.277819	0.26816	0.242191	0.261082	0.208215	0	0.284191	0.26296	0.253533	0.262101	0.445794	0.419331	0.319031	0.32397	0.235318	0.280559	0.256447	0.278911	0.322527	0.274819	0.389102	0.48757	0.511762	0.225575	0.207245	0.291193	0.283062	0.266199	0.304927	0.257705	0.271377	0.2688	0.23424	0.309549	0.265726	0.266893	0.241623	0.263016	0.294204
Environmental Information Processing	Signaling molecules and interaction	0		CON8	0.309211	0.305107	0.279534	0.188294	0.247544	0.266669	0.284191	0	0.281594	0.260991	0.304511	0.46526	0.444949	0.350841	0.358927	0.27031	0.320897	0.303744	0.299313	0.340854	0.316591	0.402891	0.492152	0.522545	0.32414	0.312972	0.292856	0.0575417	0.253135	0.291929	0.261105	0.0952359	0.240997	0.283539	0.0456863	0.276713	0.277344	0.280151	0.311377	0.329463
Genetic Information Processing	Folding, sorting and degradation	1133.49		CON9	0.229066	0.214576	0.120115	0.143239	0.131529	0.15952	0.26296	0.281594	0	0.0976975	0.211901	0.439301	0.402981	0.247987	0.234853	0.155325	0.210037	0.146551	0.255916	0.306285	0.192685	0.417747	0.510128	0.53798	0.26465	0.248344	0.244763	0.288036	0.0943377	0.127127	0.197176	0.193219	0.136052	0.259018	0.325365	0.157564	0.140309	0.132033	0.132701	0.171213
Genetic Information Processing	Replication and repair	2113.36		CON10	0.214031	0.206205	0.127861	0.179294	0.154423	0.132951	0.253533	0.260991	0.0976975	0	0.150431	0.44107	0.412963	0.259339	0.272853	0.103303	0.196737	0.179139	0.192728	0.255932	0.200328	0.369181	0.493213	0.526141	0.260354	0.244266	0.167598	0.259209	0.0940702	0.161145	0.133324	0.189393	0.166353	0.202084	0.302519	0.114843	0.123657	0.133186	0.193369	0.235404
Genetic Information Processing	Transcription	370.85		Case01	0.239578	0.234441	0.206567	0.235113	0.219697	0.163853	0.262101	0.304511	0.211901	0.150431	0	0.38743	0.359543	0.220018	0.23429	0.135504	0.132373	0.209016	0.197921	0.219555	0.190587	0.294815	0.428832	0.44707	0.200728	0.18862	0.21725	0.290227	0.182075	0.256021	0.181127	0.273656	0.236053	0.204093	0.334453	0.196704	0.207214	0.175166	0.23386	0.283171
Genetic Information Processing	Translation	1119.47		Case02	0.431992	0.418403	0.439462	0.402104	0.427271	0.404492	0.445794	0.46526	0.439301	0.44107	0.38743	0	0.0427691	0.281469	0.339692	0.433366	0.315386	0.396961	0.434213	0.379729	0.358564	0.407413	0.181995	0.233131	0.277441	0.29926	0.498503	0.466926	0.420009	0.443934	0.459758	0.434563	0.437286	0.43629	0.490103	0.438317	0.435531	0.402697	0.424573	0.449507
Human Diseases	Cardiovascular diseases	0.24		Case03	0.402922	0.386048	0.405029	0.36541	0.392075	0.371603	0.419331	0.444949	0.402981	0.412963	0.359543	0.0427691	0	0.248477	0.301359	0.402952	0.284393	0.358925	0.414688	0.363306	0.323932	0.396871	0.177485	0.259188	0.248348	0.269333	0.47966	0.448264	0.391405	0.415923	0.434606	0.411077	0.402224	0.414642	0.47303	0.409289	0.403631	0.367125	0.3844	0.40948
Human Diseases	Immune diseases	0		Case04	0.270769	0.238556	0.245914	0.227364	0.235685	0.221854	0.319031	0.350841	0.247987	0.259339	0.220018	0.281469	0.248477	0	0.0906045	0.24983	0.14209	0.196118	0.291721	0.265265	0.172177	0.333097	0.364812	0.403251	0.156462	0.160398	0.347002	0.347625	0.243766	0.281223	0.293371	0.301029	0.244035	0.286076	0.384374	0.247958	0.240703	0.196588	0.216771	0.269009
Human Diseases	Infectious diseases	87.14		Case05	0.280725	0.242363	0.23709	0.216066	0.220803	0.237852	0.32397	0.358927	0.234853	0.272853	0.23429	0.339692	0.301359	0.0906045	0	0.262083	0.176472	0.178866	0.320011	0.309836	0.18454	0.37429	0.428035	0.452063	0.19682	0.188167	0.368158	0.361902	0.245481	0.274699	0.312207	0.304793	0.227949	0.309774	0.392845	0.262641	0.244219	0.196429	0.169701	0.214031
Human Diseases	Neurodegenerative diseases	0.2		Case06	0.189098	0.183916	0.128747	0.171794	0.146394	0.0969708	0.235318	0.27031	0.155325	0.103303	0.135504	0.433366	0.402952	0.24983	0.262083	0	0.153011	0.151272	0.15514	0.218017	0.166718	0.347876	0.478345	0.510889	0.236974	0.218939	0.1666	0.250225	0.151967	0.203749	0.103636	0.231783	0.171883	0.165845	0.305983	0.111308	0.12088	0.104339	0.178175	0.231421
Metabolism	Amino acid metabolism	4568.34		Case07	0.238006	0.208922	0.198375	0.194181	0.203757	0.145984	0.280559	0.320897	0.210037	0.196737	0.132373	0.315386	0.284393	0.14209	0.176472	0.153011	0	0.162896	0.22423	0.205688	0.12715	0.283352	0.384459	0.391502	0.121487	0.119014	0.27943	0.307651	0.18539	0.240689	0.226904	0.273026	0.218938	0.230739	0.355883	0.204205	0.20305	0.149046	0.206585	0.271059
Metabolism	Biosynthesis of other secondary metabolites	835.91		Case08	0.217339	0.180479	0.139609	0.134491	0.132061	0.11106	0.256447	0.303744	0.146551	0.179139	0.209016	0.396961	0.358925	0.196118	0.178866	0.151272	0.162896	0	0.196542	0.252186	0.0942952	0.381258	0.477441	0.501365	0.210234	0.193367	0.271395	0.297835	0.18049	0.202183	0.212915	0.240833	0.144203	0.238711	0.341609	0.170279	0.148366	0.0699143	0.0840832	0.168042
Metabolism	Carbohydrate metabolism	5645.49		Case09	0.256279	0.213605	0.225966	0.252775	0.23369	0.153333	0.278911	0.299313	0.255916	0.192728	0.197921	0.434213	0.414688	0.291721	0.320011	0.15514	0.22423	0.196542	0	0.137357	0.189301	0.288711	0.451955	0.486557	0.257257	0.246738	0.166123	0.266754	0.22027	0.260718	0.130193	0.280569	0.255092	0.13263	0.324666	0.186655	0.203254	0.177572	0.270694	0.327209
Metabolism	Energy metabolism	1962.12		Case10	0.299435	0.254075	0.279944	0.29489	0.280456	0.207501	0.322527	0.340854	0.306285	0.255932	0.219555	0.379729	0.363306	0.265265	0.309836	0.218017	0.205688	0.252186	0.137357	0	0.168167	0.27122	0.39942	0.413263	0.229935	0.232059	0.235973	0.307659	0.255825	0.295124	0.208352	0.322309	0.305251	0.189173	0.364876	0.248032	0.260433	0.230132	0.320194	0.374736
Metabolism	Glycan biosynthesis and metabolism	2176.93		Case11	0.232684	0.187789	0.177979	0.171916	0.172596	0.127721	0.274819	0.316591	0.192685	0.200328	0.190587	0.358564	0.323932	0.172177	0.18454	0.166718	0.12715	0.0942952	0.189301	0.168167	0	0.334817	0.435219	0.447027	0.170372	0.159989	0.278383	0.305843	0.193341	0.22459	0.221838	0.262333	0.190434	0.229322	0.353374	0.189523	0.181074	0.0999199	0.156842	0.230138
Metabolism	Lipid metabolism	2271.13		Case12	0.363389	0.312067	0.400326	0.392469	0.397192	0.332266	0.389102	0.402891	0.417747	0.369181	0.294815	0.407413	0.396871	0.333097	0.37429	0.347876	0.283352	0.381258	0.288711	0.27122	0.334817	0	0.372954	0.375604	0.293453	0.294853	0.326004	0.372349	0.353863	0.401546	0.337108	0.396921	0.410916	0.28831	0.419363	0.369345	0.382904	0.359867	0.433919	0.480185
Metabolism	Metabolism of cofactors and vitamins	4946.46		Case13	0.397884	0.472999	0.503726	0.472397	0.496244	0.463057	0.48757	0.492152	0.510128	0.493213	0.428832	0.181995	0.177485	0.364812	0.428035	0.478345	0.384459	0.477441	0.451955	0.39942	0.435219	0.372954	0	0.271606	0.342738	0.364143	0.502382	0.479617	0.473361	0.491511	0.487104	0.485506	0.504391	0.451219	0.508414	0.492348	0.497869	0.473533	0.513662	0.541059
Metabolism	Metabolism of other amino acids	2716.68		Case14	0.48545	0.488906	0.533411	0.501007	0.524724	0.489095	0.511762	0.522545	0.53798	0.526141	0.44707	0.233131	0.259188	0.403251	0.452063	0.510889	0.391502	0.501365	0.486557	0.413263	0.447027	0.375604	0.271606	0	0.359241	0.380651	0.535611	0.516467	0.494943	0.518743	0.524612	0.511423	0.534496	0.484872	0.540715	0.523506	0.529113	0.500471	0.535572	0.563538
Metabolism	Metabolism of terpenoids and polyketides	3279.51		Case15	0.259266	0.245177	0.264908	0.223728	0.252051	0.193123	0.225575	0.32414	0.26465	0.260354	0.200728	0.277441	0.248348	0.156462	0.19682	0.236974	0.121487	0.210234	0.257257	0.229935	0.170372	0.293453	0.342738	0.359241	0	0.0295078	0.321552	0.319234	0.240014	0.283889	0.279751	0.284752	0.264119	0.243281	0.356646	0.263624	0.262445	0.207729	0.248043	0.301095
Metabolism	Nucleotide metabolism	719.86		Case16	0.24764	0.233125	0.247579	0.208358	0.235631	0.175759	0.207245	0.312972	0.248344	0.244266	0.18862	0.29926	0.269333	0.160398	0.188167	0.218939	0.119014	0.193367	0.246738	0.232059	0.159989	0.294853	0.364143	0.380651	0.0295078	0	0.306975	0.307774	0.225381	0.270321	0.263874	0.27238	0.247727	0.229201	0.346422	0.247325	0.245371	0.189529	0.228138	0.283615
Metabolism	Xenobiotics biodegradation and metabolism	1121.09		Case17	0.26858	0.2531	0.212578	0.277725	0.233547	0.196645	0.291193	0.292856	0.244763	0.167598	0.21725	0.498503	0.47966	0.347002	0.368158	0.1666	0.27943	0.271395	0.166123	0.235973	0.278383	0.326004	0.502382	0.535611	0.321552	0.306975	0	0.260335	0.205484	0.253026	0.12166	0.271994	0.248914	0.176592	0.315767	0.1861	0.204414	0.216721	0.297743	0.33654
Organismal Systems	Circulatory system	0		Treat01	0.306677	0.294754	0.273543	0.196325	0.242033	0.254922	0.283062	0.0575417	0.288036	0.259209	0.290227	0.466926	0.448264	0.347625	0.361902	0.250225	0.307651	0.297835	0.266754	0.307659	0.305843	0.372349	0.479617	0.516467	0.319234	0.307774	0.260335	0	0.251875	0.291216	0.230965	0.121599	0.242629	0.245058	0.0696276	0.263024	0.266757	0.26794	0.310085	0.342974
Organismal Systems	Digestive system	26.72		Treat02	0.238954	0.219814	0.124955	0.167118	0.139309	0.151419	0.266199	0.253135	0.0943377	0.0940702	0.182075	0.420009	0.391405	0.243766	0.245481	0.151967	0.18539	0.18049	0.22027	0.255825	0.193341	0.353863	0.473361	0.494943	0.240014	0.225381	0.205484	0.251875	0	0.114455	0.176748	0.16957	0.149153	0.219386	0.2958	0.15151	0.141193	0.143511	0.193926	0.231
Organismal Systems	Endocrine system	38.87		Treat03	0.248658	0.253317	0.159382	0.20343	0.180583	0.20844	0.304927	0.291929	0.127127	0.161145	0.256021	0.443934	0.415923	0.281223	0.274699	0.203749	0.240689	0.202183	0.260718	0.295124	0.22459	0.401546	0.491511	0.518743	0.283889	0.270321	0.253026	0.291216	0.114455	0	0.229293	0.210731	0.185515	0.271211	0.332888	0.199545	0.186708	0.188297	0.207356	0.234856
Organismal Systems	Environmental adaptation	66.14		Treat04	0.218541	0.198192	0.162082	0.216379	0.166029	0.143986	0.257705	0.261105	0.197176	0.133324	0.181127	0.459758	0.434606	0.293371	0.312207	0.103636	0.226904	0.212915	0.130193	0.208352	0.221838	0.337108	0.487104	0.524612	0.279751	0.263874	0.12166	0.230965	0.176748	0.229293	0	0.23797	0.190297	0.133566	0.289532	0.11087	0.128269	0.152379	0.236512	0.278902
Organismal Systems	Excretory system	0		Treat05	0.269829	0.261123	0.213665	0.124129	0.188476	0.220413	0.271377	0.0952359	0.193219	0.189393	0.273656	0.434563	0.411077	0.301029	0.304793	0.231783	0.273026	0.240833	0.280569	0.322309	0.262333	0.396921	0.485506	0.511423	0.284752	0.27238	0.271994	0.121599	0.16957	0.210731	0.23797	0	0.179332	0.269275	0.138847	0.226115	0.221068	0.220508	0.248047	0.267162
Organismal Systems	Immune system	26.97		Treat06	0.231638	0.196953	0.0707144	0.12993	0.0396929	0.160023	0.2688	0.240997	0.136052	0.166353	0.236053	0.437286	0.402224	0.244035	0.227949	0.171883	0.218938	0.144203	0.255092	0.305251	0.190434	0.410916	0.504391	0.534496	0.264119	0.247727	0.248914	0.242629	0.149153	0.185515	0.190297	0.179332	0	0.252933	0.281601	0.124613	0.0946799	0.130874	0.134023	0.165896
				Treat07	0.247768	0.208802	0.233425	0.247469	0.228095	0.168429	0.23424	0.283539	0.259018	0.202084	0.204093	0.43629	0.414642	0.286076	0.309774	0.165845	0.230739	0.238711	0.13263	0.189173	0.229322	0.28831	0.451219	0.484872	0.243281	0.229201	0.176592	0.245058	0.219386	0.271211	0.133566	0.269275	0.252933	0	0.305519	0.190531	0.204846	0.196506	0.277678	0.329145
				Treat08	0.344621	0.339814	0.320382	0.227112	0.288548	0.304504	0.309549	0.0456863	0.325365	0.302519	0.334453	0.490103	0.47303	0.384374	0.392845	0.305983	0.355883	0.341609	0.324666	0.364876	0.353374	0.419363	0.508414	0.540715	0.356646	0.346422	0.315767	0.0696276	0.2958	0.332888	0.289532	0.138847	0.281601	0.305519	0	0.315951	0.317774	0.318264	0.34894	0.366206
				Treat09	0.208755	0.176272	0.0890555	0.190842	0.104069	0.132008	0.265726	0.276713	0.157564	0.114843	0.196704	0.438317	0.409289	0.247958	0.262641	0.111308	0.204205	0.170279	0.186655	0.248032	0.189523	0.369345	0.492348	0.523506	0.263624	0.247325	0.1861	0.263024	0.15151	0.199545	0.11087	0.226115	0.124613	0.190531	0.315951	0	0.0366087	0.11506	0.185058	0.223546
				Treat10	0.210209	0.171947	0.0595844	0.174218	0.0740193	0.130287	0.266893	0.277344	0.140309	0.123657	0.207214	0.435531	0.403631	0.240703	0.244219	0.12088	0.20305	0.148366	0.203254	0.260433	0.181074	0.382904	0.497869	0.529113	0.262445	0.245371	0.204414	0.266757	0.141193	0.186708	0.128269	0.221068	0.0946799	0.204846	0.317774	0.0366087	0	0.100965	0.159147	0.195255
				Treat11	0.194086	0.156081	0.105282	0.132851	0.108878	0.0786622	0.241623	0.280151	0.132033	0.133186	0.175166	0.402697	0.367125	0.196588	0.196429	0.104339	0.149046	0.0699143	0.177572	0.230132	0.0999199	0.359867	0.473533	0.500471	0.207729	0.189529	0.216721	0.26794	0.143511	0.188297	0.152379	0.220508	0.130874	0.196506	0.318264	0.11506	0.100965	0	0.103636	0.181019
				Treat12	0.230295	0.204071	0.14348	0.138376	0.129626	0.161518	0.263016	0.311377	0.132701	0.193369	0.23386	0.424573	0.3844	0.216771	0.169701	0.178175	0.206585	0.0840832	0.270694	0.320194	0.156842	0.433919	0.513662	0.535572	0.248043	0.228138	0.297743	0.310085	0.193926	0.207356	0.236512	0.248047	0.134023	0.277678	0.34894	0.185058	0.159147	0.103636	0	0.109642
				Treat13	0.264393	0.222652	0.176882	0.1911	0.161741	0.228987	0.294204	0.329463	0.171213	0.235404	0.283171	0.449507	0.40948	0.269009	0.214031	0.231421	0.271059	0.168042	0.327209	0.374736	0.230138	0.480185	0.541059	0.563538	0.301095	0.283615	0.33654	0.342974	0.231	0.234856	0.278902	0.267162	0.165896	0.329145	0.366206	0.223546	0.195255	0.181019	0.109642	0
Fig. 5c								Fig. 5d
pathway	description	logFC	SE	Pvalues	adjPvalues			pathway	description	logFC	SE	Pvalues	adjPvalues
ko00364	Fluorobenzoate degradation	5.519	0.8149	1.268e-11	2.283e-09			ko04210	Apoptosis	1.029	0.962	0.2847	0.6898
ko00624	Polycyclic aromatic hydrocarbon degradation	4.248	1.046	4.901e-05	0.004411			ko04974	Protein digestion and absorption	0.9905	1.518	0.5142	0.7921
ko05131	Shigellosis	3.65	2.25	0.1048	0.8201			ko00472	D-Arginine and D-ornithine metabolism	0.7354	1.124	0.5129	0.7921
ko05100	Bacterial invasion of epithelial cells	3.419	1.985	0.08504	0.7289			ko00626	Naphthalene degradation	0.6414	0.4684	0.1709	0.6898
ko00930	Caprolactam degradation	3.383	1.261	0.007298	0.1642			ko00510	N-Glycan biosynthesis	0.6376	0.6329	0.3138	0.6898
ko05110	Vibrio cholerae infection	2.741	1.132	0.01545	0.309			ko00195	Photosynthesis	0.4902	0.6313	0.4375	0.7723
ko00980	Metabolism of xenobiotics by cytochrome P450	2.634	0.7406	0.0003752	0.02251			ko05322	Systemic lupus erythematosus	0.4751	1.292	0.713	0.8958
ko05143	African trypanosomiasis	2.369	1.19	0.04655	0.5724			ko00601	Glycosphingolipid biosynthesis - lacto and neolacto series	0.4712	0.9382	0.6155	0.8346
ko00943	Isoflavonoid biosynthesis	2.257	0.7188	0.001687	0.06073			ko04141	Protein processing in endoplasmic reticulum	0.4249	0.3184	0.182	0.6898
ko00622	Xylene degradation	1.66	0.7454	0.02598	0.4676			ko00908	Zeatin biosynthesis	0.3992	0.2907	0.1698	0.6898
ko00906	Carotenoid biosynthesis	1.419	1.229	0.2484	0.873			ko00600	Sphingolipid metabolism	0.3617	0.4764	0.4477	0.7723
ko04075	Plant hormone signal transduction	1.409	1.582	0.3732	0.873			ko00540	Lipopolysaccharide biosynthesis	0.3509	0.3763	0.3511	0.7142
ko00642	Ethylbenzene degradation	1.398	0.713	0.0499	0.5724			ko00730	Thiamine metabolism	0.3145	0.2119	0.1378	0.6898
ko00253	Tetracycline biosynthesis	1.368	0.8823	0.1211	0.873			ko04112	Cell cycle - Caulobacter	0.3117	0.1968	0.1133	0.6898
ko00791	Atrazine degradation	1.361	1.011	0.178	0.873			ko03020	RNA polymerase	0.3109	0.2968	0.2947	0.6898
ko05012	Parkinson's disease	1.322	0.6774	0.05096	0.5724			ko00750	Vitamin B6 metabolism	0.2939	0.1944	0.1306	0.6898
ko00621	Dioxin degradation	1.249	0.382	0.001081	0.04863			ko00670	One carbon pool by folate	0.2914	0.2051	0.1553	0.6898
ko04144	Endocytosis	1.208	0.6293	0.05498	0.5724			ko03010	Ribosome	0.2905	0.2149	0.1764	0.6898
ko03450	Non-homologous end-joining	1.104	1.197	0.3565	0.873			ko00340	Histidine metabolism	0.2903	0.2781	0.2965	0.6898
ko00100	Steroid biosynthesis	1.091	0.5267	0.03832	0.5724			ko00460	Cyanoamino acid metabolism	0.2863	0.3349	0.3927	0.7723
ko00941	Flavonoid biosynthesis	1.008	1.968	0.6083	0.885			ko05150	Staphylococcus aureus infection	0.2859	1.537	0.8524	0.946
ko00524	Butirosin and neomycin biosynthesis	0.8762	0.7602	0.2491	0.873			ko00400	Phenylalanine, tyrosine and tryptophan biosynthesis	0.2805	0.1997	0.1602	0.6898
ko05410	Hypertrophic cardiomyopathy (HCM)	0.8702	0.6394	0.1735	0.873			ko00900	Terpenoid backbone biosynthesis	0.2791	0.2044	0.1719	0.6898
ko00361	Chlorocyclohexane and chlorobenzene degradation	0.832	0.7084	0.2402	0.873			ko01055	Biosynthesis of vancomycin group antibiotics	0.2711	0.2352	0.2491	0.6898
ko03040	Spliceosome	0.8112	0.9446	0.3905	0.873			ko04621	NOD-like receptor signaling pathway	0.2695	0.2596	0.2992	0.6898
ko00281	Geraniol degradation	0.7862	0.6727	0.2425	0.873			ko00471	D-Glutamine and D-glutamate metabolism	0.2617	0.2002	0.1912	0.6898
ko00830	Retinol metabolism	0.7262	0.6269	0.2467	0.873			ko00970	Aminoacyl-tRNA biosynthesis	0.2561	0.1925	0.1835	0.6898
ko05130	Pathogenic Escherichia coli infection	0.6783	0.3332	0.04176	0.5724			ko05120	Epithelial cell signaling in Helicobacter pylori infection	0.2522	0.1551	0.104	0.6898
ko00623	Toluene degradation	0.6761	0.3568	0.05815	0.5724			ko00052	Galactose metabolism	0.252	0.1837	0.1702	0.6898
ko02040	Flagellar assembly	0.5921	0.8412	0.4816	0.873			ko00983	Drug metabolism - other enzymes	0.2508	0.1977	0.2045	0.6898
ko00965	Betalain biosynthesis	0.5753	0.3405	0.09112	0.7456			ko00740	Riboflavin metabolism	0.2488	0.1767	0.1592	0.6898
ko00311	Penicillin and cephalosporin biosynthesis	0.5692	1.065	0.593	0.885			ko03030	DNA replication	0.2477	0.1856	0.182	0.6898
ko00590	Arachidonic acid metabolism	0.4659	0.4175	0.2645	0.873			ko03440	Homologous recombination	0.245	0.1863	0.1885	0.6898
ko00643	Styrene degradation	0.4567	1.107	0.68	0.8902			ko00770	Pantothenate and CoA biosynthesis	0.2437	0.1653	0.1405	0.6898
ko05146	Amoebiasis	0.4506	0.8289	0.5867	0.885			ko00860	Porphyrin and chlorophyll metabolism	0.235	0.2584	0.3631	0.7221
ko03050	Proteasome	0.4157	1.948	0.831	0.9408			ko00790	Folate biosynthesis	0.2315	0.2791	0.4069	0.7723
ko04113	Meiosis - yeast	0.3879	0.7048	0.5821	0.885			ko00290	Valine, leucine and isoleucine biosynthesis	0.2261	0.1799	0.2088	0.6898
ko00363	Bisphenol degradation	0.3702	0.626	0.5543	0.885			ko03420	Nucleotide excision repair	0.2259	0.2223	0.3096	0.6898
ko02020	Two-component system	0.3551	0.1891	0.06042	0.5724			ko03060	Protein export	0.224	0.1772	0.2063	0.6898
ko01053	Biosynthesis of siderophore group nonribosomal peptides	0.3523	0.7251	0.6271	0.885			ko00240	Pyrimidine metabolism	0.2199	0.1728	0.2031	0.6898
ko00523	Polyketide sugar unit biosynthesis	0.3472	0.7101	0.6249	0.885			ko00720	Carbon fixation pathways in prokaryotes	0.2162	0.1859	0.245	0.6898
ko02030	Bacterial chemotaxis	0.3462	0.5638	0.5392	0.885			ko00250	Alanine, aspartate and glutamate metabolism	0.2154	0.227	0.3426	0.7131
ko00312	beta-Lactam resistance	0.3441	0.7451	0.6442	0.8902			ko00550	Peptidoglycan biosynthesis	0.2141	0.1818	0.2389	0.6898
ko00460	Cyanoamino acid metabolism	0.3177	0.5458	0.5605	0.885			ko00300	Lysine biosynthesis	0.2132	0.2006	0.2878	0.6898
ko00627	Aminobenzoate degradation	0.3116	0.361	0.3881	0.873			ko00020	Citrate cycle (TCA cycle)	0.2063	0.2109	0.328	0.6907
ko04142	Lysosome	0.2858	0.2625	0.2762	0.873			ko03430	Mismatch repair	0.2001	0.1741	0.2505	0.6898
ko00633	Nitrotoluene degradation	0.2766	0.4763	0.5614	0.885			ko00270	Cysteine and methionine metabolism	0.199	0.1489	0.1815	0.6898
ko00053	Ascorbate and aldarate metabolism	0.2541	0.4047	0.5301	0.885			ko00760	Nicotinate and nicotinamide metabolism	0.1834	0.1571	0.2429	0.6898
ko00380	Tryptophan metabolism	0.2479	0.2326	0.2865	0.873			ko03018	RNA degradation	0.1823	0.1817	0.3155	0.6898
ko00480	Glutathione metabolism	0.2402	0.226	0.2879	0.873			ko00500	Starch and sucrose metabolism	0.1808	0.1469	0.2184	0.6898
ko00310	Lysine degradation	0.217	0.1731	0.21	0.873			ko00780	Biotin metabolism	0.1788	0.279	0.5215	0.7921
ko04612	Antigen processing and presentation	0.1981	0.2649	0.4545	0.873			ko00710	Carbon fixation in photosynthetic organisms	0.1772	0.1492	0.235	0.6898
ko00903	Limonene and pinene degradation	0.1941	0.4746	0.6826	0.8902			ko00260	Glycine, serine and threonine metabolism	0.1769	0.1492	0.2356	0.6898
ko02010	ABC transporters	0.169	0.186	0.3634	0.873			ko00230	Purine metabolism	0.1702	0.1488	0.2526	0.6898
ko01040	Biosynthesis of unsaturated fatty acids	0.1637	0.2193	0.4555	0.873			ko00051	Fructose and mannose metabolism	0.1701	0.2423	0.4827	0.7785
ko00362	Benzoate degradation	0.1442	0.3433	0.6745	0.8902			ko00511	Other glycan degradation	0.1694	0.739	0.8187	0.946
ko02060	Phosphotransferase system (PTS)	0.1335	0.7733	0.8629	0.9564			ko00312	beta-Lactam resistance	0.1646	0.6569	0.8021	0.9446
ko00430	Taurine and hypotaurine metabolism	0.1306	0.1598	0.414	0.873			ko00330	Arginine and proline metabolism	0.1607	0.1532	0.2942	0.6898
ko00071	Fatty acid metabolism	0.128	0.1542	0.4063	0.873			ko00473	D-Alanine metabolism	0.1588	0.1331	0.2329	0.6898
ko05111	Vibrio cholerae pathogenic cycle	0.1134	0.2581	0.6603	0.8902			ko00520	Amino sugar and nucleotide sugar metabolism	0.1563	0.1548	0.3129	0.6898
ko00440	Phosphonate and phosphinate metabolism	0.1111	0.3197	0.7282	0.9074			ko00190	Oxidative phosphorylation	0.1531	0.1907	0.4223	0.7723
ko00140	Steroid hormone biosynthesis	0.09797	0.8428	0.9075	0.9748			ko00040	Pentose and glucuronate interconversions	0.1405	0.2053	0.4938	0.7823
ko05145	Toxoplasmosis	0.09563	0.08089	0.2371	0.873			ko00660	C5-Branched dibasic acid metabolism	0.1368	0.1503	0.3629	0.7221
ko00910	Nitrogen metabolism	0.06501	0.1297	0.6162	0.885			ko00960	Tropane, piperidine and pyridine alkaloid biosynthesis	0.1218	0.1591	0.4437	0.7723
ko00601	Glycosphingolipid biosynthesis - lacto and neolacto series	0.06354	1.152	0.956	0.9748			ko04910	Insulin signaling pathway	0.1213	0.185	0.5122	0.7921
ko00564	Glycerophospholipid metabolism	0.05372	0.1327	0.6855	0.8902			ko03013	RNA transport	0.1209	0.1655	0.465	0.7723
ko00410	beta-Alanine metabolism	0.0494	0.1923	0.7973	0.9189			ko00030	Pentose phosphate pathway	0.1196	0.1499	0.4252	0.7723
ko04626	Plant-pathogen interaction	0.04861	0.1533	0.7511	0.9074			ko00561	Glycerolipid metabolism	0.1183	0.1923	0.5385	0.7948
ko00650	Butanoate metabolism	0.047	0.1391	0.7355	0.9074			ko00410	beta-Alanine metabolism	0.1115	0.1794	0.5345	0.7948
ko00630	Glyoxylate and dicarboxylate metabolism	0.0417	0.1143	0.7153	0.9067			ko03008	Ribosome biogenesis in eukaryotes	0.1031	0.1729	0.5508	0.7948
ko04122	Sulfur relay system	0.04003	0.1588	0.8009	0.9189			ko03410	Base excision repair	0.1016	0.1396	0.4667	0.7723
ko00350	Tyrosine metabolism	0.03602	0.1773	0.8391	0.9439			ko04020	Calcium signaling pathway	0.09379	0.04898	0.0555	0.6511
ko03070	Bacterial secretion system	0.02385	0.1316	0.8562	0.9564			ko04146	Peroxisome	0.09162	0.3226	0.7764	0.9204
ko00130	Ubiquinone and other terpenoid-quinone biosynthesis	0.02258	0.4016	0.9552	0.9748			ko00521	Streptomycin biosynthesis	0.09066	0.2972	0.7603	0.9139
ko00785	Lipoic acid metabolism	0.01906	0.3666	0.9585	0.9748			ko00061	Fatty acid biosynthesis	0.08701	0.1858	0.6395	0.8411
ko01051	Biosynthesis of ansamycins	0.01849	0.2394	0.9384	0.9748			ko00450	Selenocompound metabolism	0.07841	0.1086	0.4703	0.7723
ko04020	Calcium signaling pathway	0.01195	0.01675	0.4754	0.873			ko00130	Ubiquinone and other terpenoid-quinone biosynthesis	0.06248	0.4242	0.8829	0.9578
ko04910	Insulin signaling pathway	0.01029	0.1824	0.955	0.9748			ko00010	Glycolysis / Gluconeogenesis	0.05558	0.1245	0.6554	0.8492
ko00360	Phenylalanine metabolism	0.01028	0.1583	0.9482	0.9748			ko00920	Sulfur metabolism	0.05313	0.1643	0.7465	0.909
ko00196	Photosynthesis - antenna proteins	0.009054	0.0239	0.7048	0.8998			ko03070	Bacterial secretion system	0.04802	0.1318	0.7157	0.8958
ko05322	Systemic lupus erythematosus	0.003029	0.002211	0.1706	0.873			ko00630	Glyoxylate and dicarboxylate metabolism	0.04428	0.1206	0.7136	0.8958
ko00902	Monoterpenoid biosynthesis	0.001227	0.00164	0.4545	0.873			ko00562	Inositol phosphate metabolism	0.04383	0.2304	0.8491	0.946
ko00331	Clavulanic acid biosynthesis	0.0005825	0.0008397	0.4879	0.873			ko00280	Valine, leucine and isoleucine degradation	0.0412	0.2173	0.8496	0.946
ko04530	Tight junction	0.000508	0.0007581	0.5028	0.873			ko00680	Methane metabolism	0.02426	0.1822	0.8941	0.9641
ko05144	Malaria	0.0002368	0.0004517	0.6001	0.885			ko04626	Plant-pathogen interaction	0.01954	0.172	0.9095	0.9691
ko04270	Vascular smooth muscle contraction	0.0001186	0.0003723	0.75	0.9074			ko00620	Pyruvate metabolism	0.01437	0.138	0.917	0.9713
ko04310	Wnt signaling pathway	4.292e-05	0.0003416	0.9	0.9748			ko05142	Chagas disease (American trypanosomiasis)	0.009338	0.005068	0.06539	0.6885
ko04962	Vasopressin-regulated water reabsorption	3.528e-05	0.0003392	0.9172	0.9748			ko01056	Biosynthesis of type II polyketide backbone	0.00563	0.01043	0.5893	0.8241
ko04622	RIG-I-like receptor signaling pathway	0	0.0003368	1	1			ko04622	RIG-I-like receptor signaling pathway	0.00135	0.002109	0.5222	0.7921
ko00920	Sulfur metabolism	-0.0005385	0.1352	0.9968	1			ko00640	Propanoate metabolism	0.0008223	0.1231	0.9947	1
ko04512	ECM-receptor interaction	-0.001103	0.0009055	0.2233	0.873			ko03015	mRNA surveillance pathway	0.0002569	0.000414	0.535	0.7948
ko05142	Chagas disease (American trypanosomiasis)	-0.005764	0.003225	0.07385	0.6646			ko00909	Sesquiterpenoid biosynthesis	4.478e-05	0.001306	0.9726	1
ko00660	C5-Branched dibasic acid metabolism	-0.01019	0.1482	0.9452	0.9748			ko04962	Vasopressin-regulated water reabsorption	3.733e-05	0.0001287	0.7718	0.9204
ko00280	Valine, leucine and isoleucine degradation	-0.01116	0.1669	0.9467	0.9748			ko00401	Novobiocin biosynthesis	0	5.255e-05	1	1
ko00640	Propanoate metabolism	-0.01222	0.1335	0.9271	0.9748			ko01057	Biosynthesis of type II polyketide products	0	5.255e-05	1	1
ko00561	Glycerolipid metabolism	-0.02171	0.182	0.9051	0.9748			ko04512	ECM-receptor interaction	0	5.255e-05	1	1
ko00620	Pyruvate metabolism	-0.02319	0.1375	0.8661	0.9564			ko04310	Wnt signaling pathway	-4.365e-05	7.311e-05	0.5505	0.7948
ko00072	Synthesis and degradation of ketone bodies	-0.02336	0.6849	0.9728	0.9837			ko04270	Vascular smooth muscle contraction	-0.0001059	0.0001508	0.4827	0.7785
ko03015	mRNA surveillance pathway	-0.02436	0.01817	0.1801	0.873			ko05144	Malaria	-0.0003185	0.0002746	0.2461	0.6898
ko00562	Inositol phosphate metabolism	-0.02504	0.1809	0.8899	0.9748			ko00331	Clavulanic acid biosynthesis	-0.0003198	0.0006915	0.6437	0.8411
ko00960	Tropane, piperidine and pyridine alkaloid biosynthesis	-0.03361	0.1506	0.8234	0.938			ko04530	Tight junction	-0.0004535	0.0006078	0.4556	0.7723
ko01057	Biosynthesis of type II polyketide products	-0.04336	0.03177	0.1723	0.873			ko00564	Glycerophospholipid metabolism	-0.0007897	0.1383	0.9954	1
ko00680	Methane metabolism	-0.04398	0.1681	0.7936	0.9189			ko00902	Monoterpenoid biosynthesis	-0.001438	0.001434	0.3161	0.6898
ko03008	Ribosome biogenesis in eukaryotes	-0.05562	0.1686	0.7415	0.9074			ko00514	Other types of O-glycan biosynthesis	-0.002623	0.003631	0.4701	0.7723
ko00010	Glycolysis / Gluconeogenesis	-0.05789	0.1437	0.687	0.8902			ko04122	Sulfur relay system	-0.004866	0.1508	0.9743	1
ko00450	Selenocompound metabolism	-0.06138	0.1192	0.6065	0.885			ko00360	Phenylalanine metabolism	-0.01157	0.1601	0.9424	0.9923
ko03410	Base excision repair	-0.06188	0.1437	0.6668	0.8902			ko01051	Biosynthesis of ansamycins	-0.0135	0.2391	0.955	0.9962
ko03013	RNA transport	-0.06266	0.1772	0.7236	0.9074			ko00196	Photosynthesis - antenna proteins	-0.01478	0.02789	0.5961	0.8244
ko00330	Arginine and proline metabolism	-0.07954	0.1523	0.6014	0.885			ko02030	Bacterial chemotaxis	-0.02693	0.5024	0.9572	0.9962
ko00030	Pentose phosphate pathway	-0.08502	0.1624	0.6005	0.885			ko05111	Vibrio cholerae pathogenic cycle	-0.02956	0.2507	0.9061	0.9691
ko00521	Streptomycin biosynthesis	-0.08911	0.2654	0.737	0.9074			ko00350	Tyrosine metabolism	-0.03	0.1719	0.8614	0.946
ko00625	Chloroalkane and chloroalkene degradation	-0.08918	0.298	0.7647	0.9146			ko00440	Phosphonate and phosphinate metabolism	-0.0523	0.2967	0.8601	0.946
ko00061	Fatty acid biosynthesis	-0.09039	0.2075	0.6632	0.8902			ko00910	Nitrogen metabolism	-0.05541	0.1658	0.7382	0.905
ko00260	Glycine, serine and threonine metabolism	-0.1047	0.1469	0.4758	0.873			ko00650	Butanoate metabolism	-0.07283	0.096	0.4481	0.7723
ko00190	Oxidative phosphorylation	-0.1097	0.176	0.5328	0.885			ko05145	Toxoplasmosis	-0.07536	0.0742	0.3099	0.6898
ko00500	Starch and sucrose metabolism	-0.1154	0.1454	0.4275	0.873			ko00785	Lipoic acid metabolism	-0.1068	0.4771	0.8229	0.946
ko00270	Cysteine and methionine metabolism	-0.1243	0.1488	0.4037	0.873			ko01040	Biosynthesis of unsaturated fatty acids	-0.1098	0.2086	0.5987	0.8244
ko00290	Valine, leucine and isoleucine biosynthesis	-0.1254	0.1836	0.4947	0.873			ko02040	Flagellar assembly	-0.1315	0.6814	0.847	0.946
ko00230	Purine metabolism	-0.1255	0.1478	0.3957	0.873			ko00430	Taurine and hypotaurine metabolism	-0.1362	0.2308	0.555	0.7948
ko04146	Peroxisome	-0.1265	0.2478	0.6097	0.885			ko02010	ABC transporters	-0.1669	0.1579	0.2906	0.6898
ko03018	RNA degradation	-0.1272	0.1786	0.4763	0.873			ko00071	Fatty acid metabolism	-0.1671	0.1978	0.3984	0.7723
ko00473	D-Alanine metabolism	-0.1282	0.1348	0.3417	0.873			ko04612	Antigen processing and presentation	-0.1806	0.2411	0.4539	0.7723
ko00760	Nicotinate and nicotinamide metabolism	-0.1311	0.1462	0.3695	0.873			ko00121	Secondary bile acid biosynthesis	-0.1886	0.9297	0.8393	0.946
ko00710	Carbon fixation in photosynthetic organisms	-0.1314	0.1415	0.3532	0.873			ko00120	Primary bile acid biosynthesis	-0.1889	0.9297	0.839	0.946
ko00860	Porphyrin and chlorophyll metabolism	-0.1341	0.2778	0.6293	0.885			ko00310	Lysine degradation	-0.1951	0.1977	0.3237	0.6898
ko00040	Pentose and glucuronate interconversions	-0.1355	0.1772	0.4443	0.873			ko00591	Linoleic acid metabolism	-0.1956	0.3795	0.6062	0.8283
ko00520	Amino sugar and nucleotide sugar metabolism	-0.1364	0.1532	0.3732	0.873			ko00362	Benzoate degradation	-0.1987	0.3483	0.5684	0.8011
ko05120	Epithelial cell signaling in Helicobacter pylori infection	-0.1437	0.1636	0.3799	0.873			ko00590	Arachidonic acid metabolism	-0.2068	1.072	0.847	0.946
ko00740	Riboflavin metabolism	-0.1445	0.1988	0.4672	0.873			ko00480	Glutathione metabolism	-0.2073	0.2476	0.4024	0.7723
ko00770	Pantothenate and CoA biosynthesis	-0.1506	0.1711	0.3788	0.873			ko03320	PPAR signaling pathway	-0.2296	0.3066	0.4539	0.7723
ko03060	Protein export	-0.1579	0.1813	0.3839	0.873			ko00072	Synthesis and degradation of ketone bodies	-0.2374	0.677	0.7258	0.896
ko00550	Peptidoglycan biosynthesis	-0.1591	0.191	0.4049	0.873			ko00380	Tryptophan metabolism	-0.2749	0.198	0.1649	0.6898
ko00051	Fructose and mannose metabolism	-0.1611	0.2413	0.5044	0.873			ko03050	Proteasome	-0.2754	1.801	0.8785	0.9578
ko00400	Phenylalanine, tyrosine and tryptophan biosynthesis	-0.1636	0.2104	0.4368	0.873			ko03040	Spliceosome	-0.3114	0.8806	0.7237	0.896
ko03430	Mismatch repair	-0.1639	0.1808	0.3646	0.873			ko04142	Lysosome	-0.3148	0.2385	0.1869	0.6898
ko00250	Alanine, aspartate and glutamate metabolism	-0.1644	0.2133	0.4408	0.873			ko02020	Two-component system	-0.3167	0.1959	0.1059	0.6898
ko00780	Biotin metabolism	-0.1645	0.2444	0.5009	0.873			ko00523	Polyketide sugar unit biosynthesis	-0.3185	0.6672	0.6331	0.8411
ko00020	Citrate cycle (TCA cycle)	-0.1666	0.1771	0.3467	0.873			ko00633	Nitrotoluene degradation	-0.3208	0.4234	0.4487	0.7723
ko00120	Primary bile acid biosynthesis	-0.1668	0.6634	0.8014	0.9189			ko01053	Biosynthesis of siderophore group nonribosomal peptides	-0.3247	0.7366	0.6594	0.8492
ko00121	Secondary bile acid biosynthesis	-0.1673	0.6633	0.8009	0.9189			ko02060	Phosphotransferase system (PTS)	-0.3316	0.7664	0.6653	0.8506
ko00340	Histidine metabolism	-0.1724	0.2877	0.5489	0.885			ko00903	Limonene and pinene degradation	-0.3739	0.7762	0.63	0.8411
ko00300	Lysine biosynthesis	-0.1744	0.2071	0.3998	0.873			ko00531	Glycosaminoglycan degradation	-0.3905	1.282	0.7607	0.9139
ko04621	NOD-like receptor signaling pathway	-0.175	0.2897	0.5459	0.885			ko00363	Bisphenol degradation	-0.3985	0.5795	0.4917	0.7823
ko00052	Galactose metabolism	-0.1793	0.1783	0.3147	0.873			ko00053	Ascorbate and aldarate metabolism	-0.4022	0.3717	0.2793	0.6898
ko03420	Nucleotide excision repair	-0.1821	0.231	0.4304	0.873			ko00965	Betalain biosynthesis	-0.4871	0.3146	0.1215	0.6898
ko00240	Pyrimidine metabolism	-0.183	0.1746	0.2948	0.873			ko00623	Toluene degradation	-0.4891	0.2901	0.09183	0.6898
ko00720	Carbon fixation pathways in prokaryotes	-0.1838	0.1725	0.2865	0.873			ko00627	Aminobenzoate degradation	-0.5552	0.2771	0.0451	0.6296
ko00750	Vitamin B6 metabolism	-0.1878	0.1744	0.2815	0.873			ko00140	Steroid hormone biosynthesis	-0.5874	1.262	0.6416	0.8411
ko03320	PPAR signaling pathway	-0.1928	0.4791	0.6874	0.8902			ko00625	Chloroalkane and chloroalkene degradation	-0.5901	NaN	NaN	NaN
ko00970	Aminoacyl-tRNA biosynthesis	-0.1931	0.2012	0.3372	0.873			ko00311	Penicillin and cephalosporin biosynthesis	-0.6325	1.099	0.5647	0.8011
ko03030	DNA replication	-0.1965	0.1883	0.2966	0.873			ko05130	Pathogenic Escherichia coli infection	-0.6958	0.3025	0.02143	0.5479
ko03440	Homologous recombination	-0.2012	0.187	0.2821	0.873			ko00621	Dioxin degradation	-0.7608	0.743	0.3059	0.6898
ko00790	Folate biosynthesis	-0.2102	0.2419	0.3848	0.873			ko00643	Styrene degradation	-0.7839	0.8366	0.3488	0.7142
ko00471	D-Glutamine and D-glutamate metabolism	-0.2139	0.211	0.3107	0.873			ko00100	Steroid biosynthesis	-0.7904	0.5259	0.1329	0.6898
ko00900	Terpenoid backbone biosynthesis	-0.2228	0.2068	0.2812	0.873			ko00281	Geraniol degradation	-0.89	0.7868	0.258	0.6898
ko00670	One carbon pool by folate	-0.2272	0.1997	0.2551	0.873			ko05146	Amoebiasis	-0.8941	1.177	0.4475	0.7723
ko03010	Ribosome	-0.2273	0.2248	0.312	0.873			ko04075	Plant hormone signal transduction	-1.035	1.754	0.555	0.7948
ko04112	Cell cycle - Caulobacter	-0.2281	0.2036	0.2624	0.873			ko03450	Non-homologous end-joining	-1.106	1.117	0.3221	0.6898
ko01055	Biosynthesis of vancomycin group antibiotics	-0.2348	0.2324	0.3122	0.873			ko00943	Isoflavonoid biosynthesis	-1.122	0.7414	0.1301	0.6898
ko03020	RNA polymerase	-0.235	0.3113	0.4504	0.873			ko00253	Tetracycline biosynthesis	-1.178	0.8383	0.16	0.6898
ko00730	Thiamine metabolism	-0.2365	0.2199	0.2821	0.873			ko00361	Chlorocyclohexane and chlorobenzene degradation	-1.194	0.7814	0.1266	0.6898
ko00195	Photosynthesis	-0.2463	0.5341	0.6447	0.8902			ko00791	Atrazine degradation	-1.224	1.037	0.2378	0.6898
ko00983	Drug metabolism - other enzymes	-0.2497	0.1828	0.1718	0.873			ko00524	Butirosin and neomycin biosynthesis	-1.251	0.6259	0.04573	0.6296
ko00531	Glycosaminoglycan degradation	-0.2695	0.9106	0.7673	0.9146			ko00642	Ethylbenzene degradation	-1.333	0.7039	0.0582	0.6511
ko00600	Sphingolipid metabolism	-0.2717	0.459	0.554	0.885			ko00830	Retinol metabolism	-1.364	0.7967	0.08691	0.6898
ko00540	Lipopolysaccharide biosynthesis	-0.2867	0.3512	0.4142	0.873			ko00906	Carotenoid biosynthesis	-1.398	1.29	0.2786	0.6898
ko00472	D-Arginine and D-ornithine metabolism	-0.3187	1.156	0.7828	0.9189			ko04144	Endocytosis	-1.45	0.6154	0.01846	0.5479
ko00511	Other glycan degradation	-0.3442	0.6488	0.5958	0.885			ko04113	Meiosis - yeast	-1.461	0.6858	0.03308	0.6164
ko00908	Zeatin biosynthesis	-0.3474	0.2785	0.2123	0.873			ko05410	Hypertrophic cardiomyopathy (HCM)	-1.585	0.6233	0.01101	0.3942
ko04141	Protein processing in endoplasmic reticulum	-0.36	0.3205	0.2612	0.873			ko00980	Metabolism of xenobiotics by cytochrome P450	-1.755	0.5772	0.002364	0.141
ko00591	Linoleic acid metabolism	-0.4168	0.7128	0.5587	0.885			ko00941	Flavonoid biosynthesis	-1.767	1.722	0.3049	0.6898
ko00401	Novobiocin biosynthesis	-0.483	0.3682	0.1896	0.873			ko05143	African trypanosomiasis	-1.874	0.9537	0.04939	0.6315
ko00510	N-Glycan biosynthesis	-0.5446	0.6447	0.3982	0.873			ko00622	Xylene degradation	-1.879	0.6426	0.003458	0.1547
ko05150	Staphylococcus aureus infection	-0.6174	1.614	0.7021	0.8998			ko05012	Parkinson's disease	-1.948	0.9381	0.03788	0.6164
ko00626	Naphthalene degradation	-0.6405	0.5665	0.2581	0.873			ko00624	Polycyclic aromatic hydrocarbon degradation	-1.993	0.9061	0.02779	0.6164
ko04210	Apoptosis	-0.9146	0.9854	0.3533	0.873			ko05110	Vibrio cholerae infection	-2.398	0.6948	0.0005595	0.05007
ko04974	Protein digestion and absorption	-1.125	1.548	0.4676	0.873			ko00930	Caprolactam degradation	-2.729	1.291	0.0345	0.6164
ko01056	Biosynthesis of type II polyketide backbone	-1.9	0.9085	0.03652	0.5724			ko00364	Fluorobenzoate degradation	-2.866	0.4769	1.851e-09	3.313e-07
ko00909	Sesquiterpenoid biosynthesis	-2.578	0.9008	0.004207	0.1262			ko05131	Shigellosis	-2.975	2.188	0.174	0.6898
ko00514	Other types of O-glycan biosynthesis	-2.637	0.9436	0.005188	0.1334			ko05100	Bacterial invasion of epithelial cells	-3.153	1.953	0.1065	0.6898
